# Supplementary material for: The German Multi-Dimensional Perceived Autonomy Support Scale for Physical Education: Adaption and Validation in a Sample of Lower Track Secondary School Students
Source: Int J Environ Res Public Health. 2020 Oct 8;17(19):7353. doi: 10.3390/ijerph17197353 (PMC7579324; doi:10.3390/ijerph17197353)
Supplement: Supplementary file 1 [file ijerph-17-07353-s001.xlsx]

## Sheet: data set - Kopie
gender	age	grade	CAs1	CAs2	CAs3	CAs4	CAs5	PAs1	PAs2	PAs3	PAs4	PAs5	OAs1	OAs2	OAs3	OAs4	OAs5	SeEf1	SeEf2	SeEf3	SeEf4	SeEf5	iVa1	iVa2	iVa3	iVa4	iVa5	iVa6	Language	Height	Weight	ISEI_Score
2	11	6	6	7	6	7	6	7	4	5	7	6	7	6	3	4	5	4	3	4	3	3	5	5	5	5	5	5	1	1.55	36.7	43
2	12	6	5	4	5	4	4	4	6	4	3	4	4	3	2	3	2	3	3	3	3	3	3	4	4	2	3	3	1	1.54	52.1	49
2	12	6	4	3	3	1	2	5	2	2	4	2	7	4	1	3	2	3	2	3	4	3	5	4	4	1	1	2	1	1.67	68.5	60
2	11	6	5	4	6	5	4	5	7	6	6	5	7	7	3	6	6	3	3	3	3	2	5	5	5	3	4	4	1	1.49	38.5	41
1	12	6	5	2	6	6	3	4	4	5	5	7	5	4	5	7	5	3	2	4	3	1	3	3	3	4	4	4	2	1.56	45.6	30
1	14	6	4	6	4	6	6	6	7	2	6	1	6	4	4	5	4	4	4	4	4	4	3	5	5	5	5	5	1	1.55	46.7	35
1	14	6	4	5	5	5	7	5	6	5	5	5	4	6	1	4	4	4	3	3	4	4	5	5	5	5	4	5	1	1.45	37.5	45
1	12	6	4	5	4	4	3	4	7	5	1	1	999	3	3	1	1	3	2	1	3	4	5	5	2	4	999	4	1	1.53	49	53
1	12	6	4	6	3	7	5	5	6	4	5	4	3	3	2	1	3	2	2	2	2	3	3	3	3	3	4	3	1	1.64	67.7	48
2	12	7	2	4	2	7	7	4	3	7	1	7	6	1	1	1	1	4	4	4	4	3	2	4	3	3	3	3	1	1.58	47.9	33
2	13	7	4	5	4	4	5	5	7	7	6	6	3	4	1	2	2	2	2	2	2	3	3	3	2	2	2	3	2	1.51	43.7	66
2	13	7	6	5	5	6	4	5	5	7	5	4	7	4	4	4	3	3	4	3	4	2	5	5	5	4	4	3	1	1.64	42.6	59
2	12	7	5	2	3	4	4	3	7	4	3	4	6	5	2	5	1	3	3	2	4	3	4	3	2	1	2	2	2	1.5	40.2	48
1	13	7	4	6	4	6	4	6	7	4	6	5	3	3	3	4	4	3	3	2	2	3	5	4	3	3	3	3	2	1.78	93.2	37
1	13	7	5	6	7	6	7	7	7	4	6	3	6	6	1	4	4	4	4	4	4	4	5	4	4	3	3	4	1	1.67	54.7	26
1	12	7	4	7	7	7	6	6	5	7	6	6	6	6	3	4	5	4	2	4	3	4	5	5	5	5	5	5	1	1.6	74.3	36
1	15	7	7	7	4	7	1	6	7	7	7	7	7	1	1	4	4	4	4	1	4	4	5	5	5	5	5	5	2	1.58	55.6	48
1	14	7	5	5	5	4	4	4	6	3	5	4	3	4	2	3	4	3	3	2	3	3	5	5	4	4	5	5	2	1.59	68.5	36
1	13	7	7	7	7	6	2	7	7	7	6	6	7	7	2	2	2	4	4	3	3	4	5	5	5	5	5	5	2	1.62	44.7	36
1	13	7	3	1	6	7	6	6	7	1	6	1	3	3	3	7	2	4	4	4	2	3	5	5	5	5	5	5	2	1.61	42.1	29
1	12	7	7	3	2	2	7	3	7	3	7	5	7	6	1	6	3	4	3	4	4	4	5	5	5	5	5	5	1	1.56	43	70
1	13	7	3	1	1	1	2	4	6	6	4	3	6	5	1	4	1	4	3	2	3	3	2	4	2	2	2	2	1	1.57	43.9	64
1	12	7	7	7	7	7	7	5	7	7	7	7	4	5	1	1	1	4	3	4	4	4	5	5	5	5	5	5	1	1.5	39.1	66
1	13	7	5	6	5	7	4	6	7	2	5	3	2	4	2	1	1	4	3	2	2	3	4	3	2	2	3	2	2	1.76	84	36
2	14	8	4	4	2	6	4	5	7	2	3	2	3	3	1	2	2	4	4	4	4	4	5	5	5	5	5	5	2	1.66	64.7	74
2	13	8	6	6	6	7	7	7	3	7	7	7	7	6	2	2	6	3	4	3	4	4	5	5	5	5	5	5	1	1.57	40	24
1	14	8	5	7	5	7	1	6	7	5	7	5	6	6	4	5	6	4	3	3	4	3	4	4	5	4	5	4	1	1.76	52.9	77
1	14	8	5	7	7	7	7	5	7	7	7	6	6	5	4	7	5	4	4	4	4	4	5	5	5	5	5	5	2	1.73	79.7	27
1	13	8	5	5	5	5	5	6	7	5	5	3	5	6	3	3	3	3	3	3	3	3	5	4	4	4	4	4	1	1.7	63.3	70
1	13	8	3	3	1	7	6	5	7	1	6	2	6	6	5	2	3	4	2	4	3	3	4	5	4	4	2	2	2	1.65	74.3	49
1	14	8	4	6	5	7	6	6	7	3	6	2	5	6	2	2	2	3	3	3	3	3	3	3	4	3	3	4	1	1.63	70.1	33
1	14	8	6	6	3	7	5	6	7	6	6	6	3	3	3	3	2	3	3	3	4	3	4	4	4	2	4	4	1	1.61	61.5	54
1	13	8	4	6	4	6	5	4	6	5	7	5	5	5	2	3	3	4	3	3	3	4	4	5	5	3	4	4	1	1.55	40.9	38
1	13	8	3	6	2	6	3	3	6	3	3	1	5	2	2	2	2	3	2	3	3	3	3	4	3	3	3	3	1	1.65	61.2	32
1	14	8	3	5	2	3	5	5	5	6	3	5	3	3	1	5	5	3	2	2	3	3	4	2	4	4	4	4	1	1.66	58.1	57
1	14	8	6	7	4	6	5	5	7	5	5	6	4	6	3	6	3	3	3	4	4	4	3	4	4	3	3	3	1	1.63	43	64
1	14	8	4	5	3	6	4	6	7	5	7	5	4	4	2	4	3	3	3	3	4	4	4	3	5	4	4	4	2	1.7	70.3	38
2	14	9	6	5	5	5	2	6	7	6	4	4	6	6	4	4	6	4	3	4	4	4	3	4	4	4	4	3	1	1.68	95.1	45
2	14	9	3	6	3	4	4	4	1	2	6	7	3	1	1	1	1	4	2	4	2	3	5	5	4	3	4	2	1	1.73	58.5	48
2	15	9	4	3	6	5	6	5	5	3	7	5	6	4	1	2	2	3	1	3	2	2	3	4	2	3	4	3	1	1.62	103.6	56
2	14	9	4	4	6	7	7	6	7	4	6	4	4	5	2	2	2	4	2	4	3	3	3	5	3	3	4	3	2	1.59	68	62
2	15	9	4	1	4	4	6	4	5	7	6	6	6	3	3	3	3	4	3	4	3	4	5	5	5	4	4	3	1	1.66	54.4	42
2	15	9	5	5	3	5	4	5	6	6	7	3	5	5	2	3	5	1	1	2	3	3	4	4	2	2	2	2	2	1.64	89	29
2	15	9	1	3	1	1	1	1	7	1	1	7	6	1	1	1	1	3	1	1	1	1	1	1	1	1	1	1	1	1.58	82.4	29
2	14	9	5	6	5	5	6	6	7	5	7	6	6	6	2	5	2	4	4	4	4	3	4	5	3	5	4	5	1	1.72	71	37
2	14	9	6	7	7	7	7	6	7	5	6	7	6	7	4	5	7	4	3	2	4	4	2	3	2	3	4	3	3	1.54	77.1	43
2	16	9	6	5	3	5	5	4	3	6	5	5	3	3	3	5	4	4	4	4	4	4	5	5	5	5	5	2	3	1.68	65.7	59
1	15	9	5	6	3	6	5	6	3	5	5	5	6	4	2	3	6	2	2	2	3	3	4	4	4	4	4	3	3	1.74	86.5	66
1	14	9	4	6	5	6	6	7	4	6	7	4	6	7	3	6	6	4	3	3	3	3	5	5	4	5	5	5	1	1.78	74	35
1	14	9	3	6	3	6	6	6	7	5	3	5	3	3	2	5	5	3	2	3	2	2	3	3	2	2	2	2	1	1.6	84.2	70
1	15	9	2	3	2	5	7	6	7	6	6	5	7	7	2	1	5	4	3	4	4	4	5	5	5	5	5	5	1	1.69	67.7	46
1	15	9	4	6	3	4	5	6	7	6	7	5	6	4	3	2	4	3	3	3	2	3	3	4	5	3	5	4	1	1.68	72.5	27
1	14	9	7	6	6	7	4	7	7	7	7	5	6	6	4	7	3	4	4	4	4	4	4	4	5	3	4	4	1	1.74	78.9	28
1	14	9	6	5	5	5	5	6	4	4	7	3	5	3	3	3	3	3	3	4	3	3	5	5	4	4	5	4	2	1.76	62.2	999
1	16	9	2	5	3	4	5	5	5	4	5	5	5	4	3	3	4	3	2	3	2	2	4	4	4	4	3	3	2	1.76	89.9	45
1	15	9	4	7	4	7	6	6	6	3	6	1	7	5	1	6	1	4	4	4	4	4	5	5	5	5	5	5	1	1.76	97.8	48
2	11	6	1	1	2	4	4	6	7	6	7	7	1	1	1	1	1	3	2	4	2	4	4	3	4	5	5	3	1	1.58	44.9	27
2	11	6	6	6	7	7	7	7	7	6	7	4	7	4	5	7	5	4	4	4	4	4	4	5	3	5	5	5	1	1.53	61.9	37
2	12	6	6	6	2	6	5	5	4	3	7	5	2	3	4	3	2	4	3	4	3	3	4	5	4	3	5	5	2	1.47	32.9	66
2	13	6	2	4	1	3	2	4	1	2	6	6	2	4	1	1	1	2	2	3	2	2	4	5	4	4	4	4	3	1.58	46	999
2	12	6	5	7	5	7	3	6	7	7	7	7	2	4	2	5	6	4	4	4	4	4	5	5	5	2	4	5	2	1.6	42.7	31
2	12	6	4	7	4	1	2	4	7	1	2	1	4	4	7	4	4	3	4	4	4	4	5	5	5	5	5	5	2	1.45	33	27
2	12	6	5	6	3	6	4	4	7	3	6	4	4	4	1	4	2	3	2	3	3	2	3	3	3	3	4	3	3	1.54	40.9	27
2	12	6	3	6	2	4	4	5	2	7	6	6	4	4	3	3	2	3	2	3	3	2	4	4	4	3	4	4	3	1.52	38.5	53
1	13	6	5	5	6	7	5	4	7	1	6	6	6	5	1	2	1	4	3	4	3	4	4	4	4	4	4	3	1	1.77	61.4	36
1	12	6	4	6	5	7	6	4	7	6	7	5	6	7	6	6	6	4	3	3	3	3	3	4	3	3	3	3	3	1.46	56.4	59
1	12	6	7	5	5	4	6	4	7	7	7	4	4	6	5	4	5	4	4	4	3	4	5	5	5	5	5	5	2	1.49	32.8	32
1	11	6	7	5	6	7	7	4	7	7	7	4	4	4	1	4	1	4	4	3	4	2	5	5	5	5	5	5	2	1.44	34.9	45
1	11	6	6	7	7	6	6	7	7	6	7	6	6	6	6	6	7	3	4	4	3	3	5	5	5	5	5	5	3	1.38	32.6	31
1	11	6	7	5	7	5	6	6	7	7	7	6	7	7	3	7	7	4	4	3	4	2	5	2	2	2	4	5	2	1.51	53.7	27
1	12	6	6	6	5	6	5	6	7	7	7	3	7	5	3	2	3	3	2	3	3	3	4	5	4	4	4	5	1	1.52	48.5	35
1	11	6	6	6	5	6	4	7	6	3	5	3	7	4	1	3	1	3	3	4	2	3	3	3	3	3	3	4	1	1.49	30.4	16
1	12	6	5	6	6	6	4	6	7	5	7	4	4	4	2	2	2	3	2	3	3	3	5	4	5	4	4	4	1	1.56	56.7	33
2	11	6	5	6	5	7	7	6	7	5	7	5	6	6	5	5	7	4	4	3	4	4	5	5	5	5	5	5	2	1.58	61.7	38
2	11	6	7	6	7	7	7	7	7	6	7	6	5	7	4	4	6	4	4	3	4	4	4	4	4	4	4	4	1	1.53	43.7	33
2	13	6	6	7	5	6	5	6	7	7	7	6	6	6	3	2	6	3	2	3	3	3	5	5	2	2	2	2	1	1.6	42	32
2	12	6	6	6	6	7	7	6	7	5	7	6	5	2	2	6	2	3	1	3	4	4	5	5	2	3	4	5	3	1.66	48.6	49
2	11	6	4	2	6	7	6	7	4	5	7	6	2	4	7	7	7	4	4	4	1	4	5	4	5	3	5	5	1	1.52	50.2	33
2	12	6	7	7	6	6	6	7	7	7	7	7	6	6	4	4	4	2	2	4	3	3	4	3	3	3	2	2	2	1.68	75.7	48
1	12	6	4	6	4	7	6	7	7	6	6	6	6	4	2	6	4	1	4	4	4	4	5	5	5	5	5	5	2	1.52	56.2	53
1	13	6	6	7	5	6	7	7	7	6	7	6	5	6	1	5	5	4	4	4	4	4	5	5	5	5	4	2	3	1.52	41.6	38
1	13	6	7	7	6	5	4	4	7	7	7	7	6	5	3	6	7	4	4	4	3	4	5	5	5	5	5	5	1	1.61	66.8	49
1	12	6	5	7	4	7	7	6	7	6	7	7	7	5	3	3	3	4	4	4	3	3	5	4	4	5	4	5	2	1.44	49.9	38
2	13	7	5	6	5	5	7	7	6	7	7	5	7	7	4	5	5	3	3	3	2	4	5	5	5	5	5	4	3	1.48	54	63
2	14	7	5	6	6	7	6	6	7	4	7	6	4	3	5	6	5	3	2	3	3	2	3	3	4	3	3	2	2	1.7	74.3	48
2	12	7	5	6	6	6	7	7	6	5	7	7	5	5	1	5	5	3	2	4	999	999	4	5	3	4	4	4	2	1.55	36.1	34
2	13	7	6	6	6	5	6	6	6	5	5	2	5	5	1	4	6	4	3	4	3	4	5	4	4	4	4	5	2	1.69	45.3	48
2	12	7	5	5	5	4	4	4	5	4	6	4	4	4	3	4	3	3	2	3	3	2	3	2	4	2	4	3	2	1.59	58.9	40
2	14	7	6	6	3	3	3	6	7	5	5	2	5	2	1	3	3	3	3	2	2	3	4	5	4	2	2	2	1	1.52	56.1	999
1	13	7	5	5	6	5	7	4	7	6	6	7	2	4	4	4	6	4	4	3	4	4	4	5	4	5	5	4	3	1.62	52	48
1	14	7	6	7	6	7	6	6	7	7	7	6	7	7	4	6	6	4	4	3	3	4	4	4	4	3	4	4	2	1.77	75.7	35
1	14	7	6	4	7	6	3	4	7	1	3	1	2	3	1	1	1	4	4	4	1	2	3	5	5	4	5	5	2	1.58	55.4	53
1	12	7	4	5	5	6	6	5	7	6	6	3	6	4	3	3	4	3	3	3	3	3	3	2	2	1	2	2	1	1.73	94.3	18
1	12	7	6	6	4	3	7	5	7	6	3	4	5	6	1	1	3	4	3	3	3	4	5	5	5	5	5	5	999	1.58	40.1	24
1	12	7	7	6	7	7	7	7	7	7	7	6	6	6	5	5	6	4	4	4	4	4	5	5	5	5	5	5	999	1.5	42.6	59
1	12	7	7	7	7	7	6	7	7	7	7	5	5	3	1	3	3	2	1	3	2	2	2	5	4	5	4	2	2	1.84	82.2	31
1	12	7	6	6	5	7	5	6	7	4	6	6	4	3	1	4	4	3	4	3	3	3	4	5	5	5	3	3	3	1.69	60.9	48
1	14	7	7	6	7	7	7	7	7	7	7	7	5	6	5	5	5	3	3	4	4	4	5	5	5	5	5	5	2	1.72	82.7	20
1	13	7	7	7	6	6	7	7	7	6	7	6	6	6	3	4	3	4	3	4	4	4	4	4	4	4	2	4	2	1.64	44.8	17
1	14	7	6	5	3	6	5	5	5	1	6	1	7	4	5	5	7	4	3	2	3	3	5	5	5	5	5	5	3	1.74	80.5	53
1	13	7	5	6	6	7	6	5	5	7	6	7	3	5	2	1	1	3	3	4	3	2	5	3	3	4	3	4	3	1.66	76.3	49
2	12	7	7	7	6	7	7	5	7	7	7	6	6	4	4	6	2	3	3	4	4	4	5	4	4	3	4	4	999	1.54	62.1	70
2	12	7	6	7	7	7	7	6	7	3	6	3	5	6	3	6	7	4	3	3	4	4	4	4	4	3	4	4	1	1.55	56.5	27
2	14	7	6	3	2	4	4	4	7	1	5	4	4	1	1	5	1	3	2	3	2	1	3	2	3	3	2	2	2	1.52	73.6	47
2	12	7	5	6	5	6	3	6	7	6	7	6	3	3	1	3	3	4	3	4	3	4	5	5	5	4	4	4	1	1.58	56.7	49
2	13	7	5	7	4	6	3	6	7	5	5	6	6	6	2	4	2	4	4	4	3	3	4	5	3	4	4	4	2	1.63	57.8	33
1	13	7	4	4	4	4	5	5	7	7	6	7	5	5	3	4	4	4	4	4	4	3	4	5	3	4	3	3	3	1.68	53.6	47
1	12	7	6	5	6	5	6	5	7	7	7	7	6	6	2	6	5	4	4	4	3	3	5	5	5	5	5	5	2	1.6	46.4	70
1	13	7	6	6	6	6	6	7	7	7	7	7	7	7	5	6	4	3	4	4	4	4	5	4	5	5	5	5	1	1.54	41.7	33
1	13	7	6	4	5	4	2	7	6	5	7	7	6	4	1	3	1	3	1	2	2	3	4	4	3	3	3	5	1	1.63	70.7	48
1	13	7	7	6	7	5	7	7	7	7	7	7	7	6	1	4	4	4	4	3	4	4	5	5	5	5	5	5	2	1.57	44.4	27
1	12	7	1	4	1	1	4	4	7	7	7	7	7	4	4	1	1	4	3	2	4	4	3	5	5	4	3	3	2	1.61	63.5	26
1	13	7	6	7	6	5	6	3	6	7	6	6	6	6	4	6	4	3	2	1	2	2	4	3	2	2	2	2	2	1.7	122.7	29
1	13	7	5	3	3	5	2	3	5	7	6	7	7	4	1	3	1	2	1	2	3	2	1	4	1	1	1	1	3	1.52	60.2	32
1	12	7	5	6	5	5	5	4	7	7	5	7	6	4	2	2	4	3	3	3	4	4	4	3	4	1	3	4	2	1.62	54	27
1	13	7	6	2	1	2	6	4	7	4	5	4	5	4	2	2	4	3	3	4	4	4	4	3	4	3	3	2	3	1.62	70.5	62
2	13	8	5	7	6	7	7	6	7	7	7	6	5	6	5	6	7	3	3	2	3	4	2	3	2	1	1	2	2	1.52	51	38
2	15	8	5	4	4	6	4	3	6	3	5	5	5	3	5	5	3	3	3	4	3	3	2	3	4	2	3	3	2	1.5	46.8	32
2	15	8	7	5	3	4	3	6	6	6	6	4	5	6	5	4	5	3	3	2	3	4	4	4	4	3	3	3	2	1.65	67.6	35
2	14	8	6	6	5	6	6	6	7	7	7	7	6	6	5	5	6	4	3	3	4	3	3	4	4	3	3	2	3	1.59	72.8	27
2	14	8	2	4	2	4	3	4	6	1	6	7	5	4	1	1	2	3	3	4	2	3	2	4	3	1	2	1	3	1.68	59	17
1	14	8	7	5	6	5	5	6	4	7	7	7	7	7	3	5	6	3	3	3	4	3	5	5	5	5	5	5	3	1.65	54.3	29
1	14	8	7	3	1	1	4	7	7	6	7	7	5	4	1	2	4	3	3	2	3	2	3	999	1	3	3	3	999	1.83	76	59
1	14	8	6	3	2	2	5	5	5	6	6	7	3	4	2	3	3	3	3	2	3	4	3	4	3	4	4	2	2	1.67	67.8	999
1	13	8	6	7	5	6	4	6	6	7	5	6	5	6	6	6	6	3	2	3	3	2	4	5	4	4	4	4	3	1.68	49.3	33
1	13	8	6	4	1	6	6	4	7	7	6	7	6	3	3	7	6	3	3	2	3	3	3	4	4	5	4	4	3	1.61	62	26
1	14	8	7	7	7	7	7	7	7	7	7	7	7	7	5	6	7	4	4	4	4	4	5	5	5	5	5	5	3	1.69	54.9	27
1	15	8	3	7	5	7	5	3	6	7	6	7	5	4	1	2	3	3	3	3	2	4	4	5	5	5	4	4	3	1.62	77.5	999
1	15	8	5	7	6	7	6	6	7	6	6	7	5	6	7	6	6	4	3	4	4	4	4	4	4	4	2	4	1	1.71	60.2	68
1	13	8	5	5	5	5	5	5	7	7	6	7	7	5	2	7	5	4	4	4	4	4	5	5	4	4	4	4	3	1.82	61.4	26
2	15	8	6	6	4	6	5	5	6	7	5	7	6	4	3	4	5	3	2	2	3	3	3	3	3	4	3	2	3	1.56	82	33
2	13	8	3	7	3	5	1	6	6	5	6	5	3	2	2	3	2	4	3	3	2	4	3	4	4	4	4	4	2	1.54	51.3	38
2	13	8	3	4	5	5	6	4	6	5	7	7	5	3	3	3	5	3	3	3	3	2	4	4	4	4	4	4	3	1.51	56.9	42
2	14	8	3	5	3	6	5	4	7	6	7	7	5	5	2	4	4	3	3	3	3	3	2	3	1	3	5	4	2	1.65	55.2	42
1	14	8	7	6	4	7	999	6	7	7	6	7	6	6	4	999	5	4	4	3	999	2	5	4	5	5	5	5	2	1.66	52	53
1	14	8	6	7	6	7	5	6	7	7	7	5	7	7	6	7	6	4	3	3	2	3	4	5	5	5	5	5	2	1.76	55.9	17
1	15	8	5	6	5	6	6	7	7	6	7	6	6	6	6	5	4	3	3	3	2	3	5	4	5	4	4	4	2	1.8	72.1	53
1	13	8	1	4	2	3	3	3	6	6	4	7	5	7	5	5	5	4	4	4	2	3	4	3	5	5	4	3	1	1.68	55.7	42
1	14	8	7	6	5	6	7	7	7	6	7	7	7	6	5	5	6	4	4	3	3	4	5	5	4	5	5	5	2	1.67	60.8	52
1	14	8	5	6	5	7	5	6	7	7	7	7	5	3	6	3	1	3	3	3	2	2	5	5	5	4	4	4	3	1.73	62.9	45
1	14	8	6	7	6	7	7	6	7	6	7	7	7	7	5	5	7	3	3	3	2	3	4	5	5	5	5	5	2	1.73	89.2	18
1	14	8	5	5	5	6	6	7	5	6	6	7	5	6	7	7	6	4	3	4	3	4	4	4	5	5	5	5	1	1.66	52	45
1	999	8	3	7	7	7	7	6	7	7	7	7	7	6	3	6	6	4	3	3	3	4	1	4	5	4	4	4	2	1.59	73.4	38
1	14	8	5	3	3	6	2	2	6	2	6	5	3	1	5	2	6	1	1	2	1	2	1	3	2	1	2	2	1	1.69	79.7	27
2	14	9	6	6	5	6	6	6	7	7	6	6	3	6	4	3	3	3	3	4	3	3	5	3	4	4	4	4	2	1.58	58	33
2	15	9	6	6	4	6	4	6	6	3	5	3	6	6	3	3	3	3	2	3	3	3	4	5	5	4	4	3	1	1.66	70.6	33
2	17	9	6	6	6	7	6	2	7	6	6	6	6	6	6	6	6	3	3	3	3	4	4	4	5	4	4	4	2	1.68	57.5	33
2	14	9	5	6	5	6	5	6	7	6	7	6	6	5	2	6	5	3	2	3	3	3	4	4	4	2	4	4	3	1.62	52.7	27
1	16	9	5	7	6	7	6	6	6	4	6	6	2	5	5	5	2	4	3	3	3	3	4	1	2	4	4	4	2	1.88	91.9	33
1	13	9	7	6	6	6	6	7	7	6	5	5	4	6	4	4	4	4	4	3	3	4	4	5	5	2	5	4	2	1.61	80.1	33
1	15	9	6	7	6	7	6	6	7	6	6	5	5	5	4	5	4	3	3	4	4	4	3	5	4	2	4	4	3	1.7	63.3	56
1	15	9	4	5	4	6	3	5	6	6	5	4	3	4	2	4	3	3	4	3	2	3	2	4	3	3	3	3	2	1.64	50.2	53
1	16	9	5	7	6	7	5	6	7	6	6	5	5	5	2	4	2	3	3	2	3	4	4	5	4	4	4	4	3	1.72	53.6	46
1	15	9	6	7	5	6	6	6	7	3	6	5	4	4	5	1	2	3	3	1	3	3	4	2	4	2	3	4	2	1.72	59.8	48
1	16	9	5	5	6	7	7	6	7	7	7	7	6	6	6	7	7	4	4	3	4	4	5	5	5	5	5	5	2	1.77	64.8	38
1	14	9	5	7	5	7	5	4	7	7	6	5	4	3	2	5	4	4	3	4	3	3	3	5	5	4	5	5	2	1.66	60	33
1	15	9	6	5	7	7	7	7	7	6	4	2	2	4	2	5	6	4	4	3	4	4	4	5	5	5	4	4	2	1.7	60	18
1	15	9	6	7	6	6	6	6	7	6	6	4	6	5	6	6	6	3	3	3	3	3	5	5	4	4	999	4	2	1.65	78.4	17
2	15	9	5	6	6	6	5	6	6	5	7	4	4	5	4	4	4	3	3	4	3	3	5	5	5	4	4	4	1	1.65	49.7	53
2	14	9	6	6	6	6	6	6	7	6	6	6	4	5	4	4	999	3	3	3	3	3	3	4	3	3	3	3	3	1.53	60	38
2	14	9	6	7	5	7	7	6	6	6	7	6	7	6	2	2	5	3	3	2	3	3	5	5	5	5	5	5	2	1.7	68	44
2	14	9	6	5	2	5	5	5	6	2	6	1	7	6	2	2	7	4	2	3	3	3	4	5	1	4	5	4	3	1.65	58.7	48
2	14	9	5	6	7	7	7	7	7	7	7	7	6	6	5	5	6	3	3	3	4	4	4	3	4	3	3	5	1	1.51	53.3	27
2	15	9	5	4	5	4	4	6	6	5	6	5	6	5	4	6	5	3	2	2	3	3	2	3	3	2	2	2	2	1.62	66	42
2	15	9	5	5	3	5	7	4	7	1	6	2	6	4	5	1	6	3	3	4	3	3	2	4	2	1	1	2	2	1.58	71.2	45
1	15	9	6	2	5	3	3	3	7	5	2	3	6	3	3	5	2	3	3	3	3	4	1	4	4	2	2	2	1	1.66	52.7	34
1	14	9	5	5	5	5	5	6	5	5	6	3	5	3	3	3	3	3	3	3	3	3	2	2	2	2	2	2	1	1.73	84.1	36
1	15	9	4	3	999	3	1	1	1	3	3	2	3	2	1	4	1	3	3	2	3	3	1	2	2	1	1	1	2	1.76	99.5	45
1	15	9	5	999	6	6	6	6	7	5	6	5	6	5	3	4	5	3	2	3	4	3	4	4	5	4	4	4	2	1.64	57	29
1	15	9	3	7	5	7	6	5	6	5	7	6	5	6	6	5	5	4	4	3	3	3	5	5	4	3	4	3	2	1.74	68	38
1	15	9	5	6	7	6	7	3	7	6	7	5	3	3	1	3	1	4	4	4	4	4	4	5	5	4	5	4	3	1.73	62.5	10
1	16	9	4	7	5	6	6	6	7	7	7	6	6	6	7	4	4	4	3	4	4	3	2	3	3	4	3	3	2	1.76	65.6	26
1	14	9	3	6	5	6	2	1	7	1	3	5	5	5	1	3	2	4	4	3	4	3	2	4	1	5	5	5	3	1.71	62.2	42
1	14	9	6	6	6	7	6	7	6	7	6	4	6	5	2	5	2	3	3	3	3	3	4	5	5	4	4	5	1	1.69	49.5	53
1	15	9	5	5	3	5	6	6	6	7	7	7	7	7	1	6	3	3	2	4	3	4	2	5	2	4	5	5	3	1.77	70.5	16
2	12	6	6	3	4	5	6	1	7	6	7	4	3	5	1	1	1	3	2	3	2	3	2	4	3	2	1	2	1	1.65	52	33
2	11	6	5	6	6	6	6	6	7	4	7	5	3	5	2	6	4	3	3	3	2	4	4	3	4	2	2	3	2	1.47	39	71
2	11	6	5	6	5	6	3	6	7	6	6	1	6	5	5	3	7	4	4	4	4	4	5	5	5	5	5	4	1	1.52	47	41
2	12	6	5	6	5	5	5	5	6	6	4	6	5	5	3	5	3	3	2	4	3	3	4	4	3	3	4	4	2	1.52	35	26
2	11	6	6	5	5	6	3	5	5	6	6	5	5	5	3	3	5	4	3	3	3	3	3	4	3	3	4	4	1	1.58	54	61
2	12	6	5	7	5	7	7	3	7	6	7	6	6	7	3	5	5	4	3	4	3	4	5	5	5	5	5	5	1	1.6	48	26
1	11	6	4	5	7	6	5	6	3	3	7	7	7	6	2	4	6	4	4	3	4	3	5	4	5	5	5	5	1	1.48	36	42
1	11	6	3	7	4	4	2	7	7	2	6	2	7	5	1	2	2	4	4	3	3	4	5	5	5	5	5	5	1	1.48	47	48
1	12	6	7	7	7	7	7	7	7	7	7	7	7	7	4	6	5	4	4	4	4	4	5	5	5	5	5	5	1	1.49	40	37
1	12	6	6	7	6	7	6	7	7	6	7	6	6	7	6	7	6	3	3	4	4	3	5	5	5	2	2	5	1	1.67	83	44
1	12	6	6	7	5	7	5	6	5	3	6	2	5	3	2	3	2	4	4	4	3	3	5	5	4	4	5	5	1	1.6	47	48
1	11	6	2	7	4	6	6	6	7	1	7	4	2	5	1	1	1	4	3	4	3	4	5	5	5	5	5	5	1	1.37	29	48
2	12	6	6	5	6	4	6	7	7	7	7	5	4	4	1	4	2	4	3	3	4	3	5	5	4	3	3	5	3	1.58	56	26
2	11	6	5	4	4	3	2	4	2	1	3	1	1	2	1	1	4	3	2	2	3	2	1	5	1	1	2	2	1	1.54	59	27
2	12	6	5	4	2	6	4	5	2	4	3	4	6	2	2	6	4	3	2	2	2	2	3	3	3	3	2	2	2	1.73	61	29
2	11	6	3	5	3	4	2	5	4	2	5	2	2	2	1	2	3	3	2	3	1	3	4	4	4	1	3	2	1	1.43	40	33
1	12	6	7	7	7	7	3	7	7	5	7	3	5	5	3	3	1	4	4	3	4	4	2	3	3	1	1	1	1	1.65	75	39
1	13	6	4	5	6	6	5	6	4	2	6	5	4	3	5	4	3	3	2	3	3	4	4	3	2	3	5	4	3	1.63	45	32
1	13	6	7	7	7	7	5	5	6	5	7	6	1	1	1	1	2	3	4	4	3	3	5	4	5	5	5	5	3	1.6	50	35
1	12	6	6	5	6	4	4	6	4	3	7	3	3	6	3	7	3	3	2	4	2	4	4	4	5	4	3	4	1	1.47	40	38
1	13	6	6	5	5	5	6	5	4	4	4	3	6	6	7	5	5	2	4	3	3	4	5	4	4	3	5	3	2	1.58	45	999
1	12	6	6	5	4	7	5	7	7	2	6	2	5	5	1	5	3	4	3	2	3	2	4	1	2	3	2	1	1	1.53	43	58
1	12	6	4	7	7	7	7	4	4	7	7	6	6	6	3	4	4	2	1	1	1	2	5	3	3	4	4	2	1	1.52	50	74
1	12	6	6	7	6	6	7	7	7	6	7	5	6	5	4	5	4	3	4	4	4	4	5	5	5	4	3	4	1	1.48	43	41
1	11	6	3	6	3	7	6	5	7	2	7	1	7	5	1	5	5	3	3	3	2	3	5	4	4	2	4	4	1	1.5	42	30
1	12	6	7	7	4	7	7	7	7	4	7	4	7	7	1	7	3	4	3	4	2	4	5	5	5	5	5	5	1	1.49	37	35
2	12	7	3	3	3	3	4	4	6	2	5	2	4	4	1	4	3	3	3	2	3	3	2	4	4	4	3	2	1	1.65	58	26
2	13	7	3	7	6	6	4	4	6	2	7	4	4	4	4	6	4	2	2	3	3	2	2	3	4	4	4	4	2	1.62	58.4	36
2	13	7	3	6	3	6	4	4	2	2	7	5	4	2	3	3	2	3	3	2	2	3	2	4	2	2	2	2	2	1.58	53.6	28
2	13	7	6	4	2	3	3	2	7	5	6	6	1	2	1	2	1	4	2	2	2	3	4	5	5	5	5	5	2	1.62	51.9	10
1	13	7	3	3	2	1	2	6	6	2	5	2	6	1	1	1	2	2	4	3	4	4	4	3	4	3	2	2	1	1.77	55.2	18
1	12	7	3	4	4	2	7	4	7	3	3	7	6	3	4	1	2	1	3	2	3	2	3	3	2	1	1	2	2	1.65	71.8	17
1	13	7	3	4	3	6	5	4	3	5	4	4	5	5	2	2	3	4	3	4	3	4	4	5	5	5	5	5	1	1.58	45.6	55
1	12	7	3	4	3	4	5	2	7	4	6	2	4	3	1	1	2	3	2	1	3	3	4	4	4	3	3	4	1	1.56	60.4	41
1	13	7	3	4	1	6	1	1	6	7	1	1	3	1	1	1	1	3	2	2	3	3	5	3	4	3	3	3	1	1.69	68.5	41
1	14	7	5	7	5	6	6	6	6	7	7	5	6	6	2	4	1	4	4	4	4	4	5	5	5	5	5	5	3	1.71	59	33
1	12	7	2	5	3	5	3	4	3	3	5	6	3	5	1	3	6	3	3	3	3	4	4	4	4	2	4	2	1	1.51	55.6	52
1	13	7	3	5	5	3	4	6	6	3	6	6	5	4	2	3	3	3	4	3	3	4	5	4	4	4	5	5	1	1.59	48.3	44
1	12	7	5	5	2	5	3	5	5	1	3	4	6	3	3	1	3	3	2	4	4	4	4	5	5	5	5	5	1	1.65	57.2	43
1	13	7	5	7	4	6	6	6	7	4	7	3	6	5	1	3	1	4	4	3	4	4	5	5	4	5	5	5	1	1.67	69.5	33
1	13	7	5	6	6	6	5	7	7	2	7	5	7	7	4	1	6	3	3	3	3	4	5	5	5	4	4	4	1	1.66	55.6	41
2	13	7	3	4	1	2	3	4	6	5	5	5	5	4	1	3	5	3	4	2	4	4	1	1	1	1	1	1	1	1.58	42	52
2	13	7	5	4	4	4	5	6	1	1	6	6	4	2	1	2	1	1	2	1	2	3	2	2	1	1	1	1	2	1.56	54.4	38
2	12	7	3	3	5	6	5	2	3	2	5	2	5	3	1	2	1	4	3	3	3	3	3	4	4	3	2	4	1	1.56	55.8	43
1	12	7	5	4	4	3	5	5	2	5	3	2	5	5	1	3	2	4	3	4	4	4	5	5	5	5	5	5	1	1.57	58.1	49
1	13	7	3	4	3	6	6	4	7	5	7	5	5	5	4	5	4	4	2	4	3	4	4	5	5	5	5	5	1	1.66	79.8	34
1	12	7	2	6	3	7	6	4	6	6	6	5	1	4	1	1	1	4	3	3	3	4	4	5	4	2	4	4	1	1.55	50.9	37
1	12	7	5	5	3	3	1	4	7	4	6	5	6	5	4	2	3	4	2	4	4	4	4	5	5	5	5	5	3	1.41	39.2	51
1	15	7	3	1	1	7	3	5	7	7	7	3	6	1	1	999	1	2	3	4	3	3	3	2	3	4	3	3	3	1.75	66	33
1	12	7	4	3	3	6	7	2	4	5	6	5	5	2	1	7	6	4	4	3	3	3	5	3	5	3	5	4	1	1.42	34.3	74
1	13	7	5	5	5	7	4	6	2	5	5	5	7	5	1	4	1	4	3	4	3	4	4	4	5	2	1	2	1	1.61	54.5	26
1	13	7	1	4	1	4	7	3	4	1	6	4	2	2	1	1	1	4	3	3	4	3	5	5	5	5	5	5	1	1.5	57.5	42
2	14	8	6	6	6	7	6	6	5	6	6	6	6	3	5	6	5	4	3	4	4	3	4	5	5	4	4	4	1	1.63	48.2	72
2	13	8	6	6	6	6	6	5	6	3	5	3	4	4	3	6	4	4	4	4	3	4	5	4	4	5	5	5	3	1.59	44.5	18
2	13	8	6	5	6	6	6	5	6	6	6	6	5	4	4	6	5	4	4	4	3	4	5	4	4	5	5	5	1	1.59	40.1	42
2	13	8	6	6	5	6	5	5	7	7	7	7	5	6	3	5	6	3	2	3	3	4	5	4	4	4	4	4	1	1.66	53.4	50
2	15	8	6	7	4	7	6	4	7	6	7	7	6	6	4	4	3	3	2	3	3	3	3	5	4	3	3	4	2	1.63	69	999
2	13	8	6	5	6	6	3	5	6	3	7	3	5	4	3	5	3	3	2	3	3	4	5	5	5	3	3	3	3	1.62	66.9	33
2	14	8	7	6	6	6	6	6	7	7	7	7	6	5	5	6	6	4	3	4	3	4	4	5	4	4	4	4	1	1.62	57	33
2	14	8	6	6	5	5	7	5	7	6	6	7	6	5	2	6	2	3	2	3	3	4	4	4	5	4	4	4	2	1.54	78.9	42
2	14	8	6	7	7	6	7	6	6	5	7	5	7	6	6	6	7	3	3	2	2	4	2	4	3	4	2	3	1	1.6	45.2	65
1	13	8	5	7	6	7	7	7	7	7	7	7	7	4	2	6	1	4	4	4	4	4	5	5	5	5	5	5	2	1.7	69.3	48
1	14	8	7	7	6	7	5	6	6	6	7	3	2	6	5	3	2	3	1	2	3	4	4	5	5	2	2	4	1	1.75	63.4	48
1	14	8	7	6	5	6	5	7	7	6	6	3	7	6	5	5	3	4	3	4	3	4	5	4	4	4	4	4	1	1.75	55.7	18
1	13	8	6	7	6	7	7	7	7	6	7	6	5	5	1	6	3	4	3	4	4	3	5	5	5	5	5	5	1	1.6	44.9	63
1	14	8	5	4	5	7	6	7	5	6	7	6	6	6	2	5	4	4	3	3	4	4	5	5	3	4	4	4	1	1.63	64.7	50
1	14	8	6	4	5	6	6	5	7	5	6	5	5	5	3	2	5	4	3	4	4	4	5	5	5	5	5	5	1	1.75	63	50
1	14	8	6	6	4	7	5	5	6	3	7	6	7	4	3	4	4	4	3	3	4	3	5	5	5	5	5	5	1	1.71	66	43
1	14	8	6	6	6	5	6	7	7	6	6	5	6	4	3	5	5	3	3	3	2	3	5	3	5	3	3	2	3	1.59	73	36
1	13	8	6	6	5	6	6	6	7	5	6	5	6	6	5	5	5	4	3	3	3	4	4	4	3	4	4	4	1	1.67	51.7	54
1	13	8	6	6	5	7	7	7	7	6	6	5	5	4	4	4	6	3	2	2	3	2	4	4	3	4	4	3	3	1.71	55.1	42
1	14	8	6	6	5	6	6	6	7	7	7	7	7	7	5	6	6	4	4	4	4	4	2	4	4	4	4	5	1	1.69	51	30
1	14	8	7	7	7	7	7	5	7	6	7	7	6	6	6	7	7	4	4	4	4	4	4	5	4	4	4	4	1	1.63	52.9	48
1	13	8	3	4	3	4	2	3	6	3	6	1	6	4	5	3	1	4	3	4	2	3	3	5	2	4	4	4	2	1.55	68.4	69
1	13	8	6	5	6	6	4	6	7	6	6	6	5	4	4	5	4	3	3	3	3	3	5	4	3	4	4	4	1	1.69	54.9	52
2	15	9	6	7	7	7	6	6	6	6	6	6	7	6	5	6	6	3	2	2	3	3	3	4	3	1	3	3	1	1.58	48.2	50
2	14	9	6	3	4	7	6	5	6	6	6	7	3	5	3	6	6	3	4	3	3	3	5	5	4	4	5	4	1	1.66	68	50
2	14	9	6	6	6	6	6	6	7	7	7	7	3	5	3	6	4	3	2	3	3	3	4	3	3	3	3	2	1	1.65	59.5	32
2	15	9	6	5	6	5	5	5	6	7	7	3	6	5	6	7	7	3	1	3	1	1	2	2	2	2	2	2	1	1.62	65	55
1	16	9	5	6	5	6	6	5	7	5	7	6	4	5	6	5	7	4	4	3	3	3	3	4	3	5	5	4	2	1.66	48	34
1	14	9	6	6	6	7	7	5	5	5	7	6	5	6	5	5	5	4	3	4	4	4	5	5	4	5	5	5	1	1.64	63.2	41
1	15	9	5	5	2	5	6	3	6	3	4	5	4	6	1	3	2	4	3	3	3	3	5	5	4	4	4	4	2	1.73	59.9	29
1	15	9	5	7	5	7	2	6	7	7	6	6	6	6	4	1	7	4	3	3	3	3	5	5	5	4	2	3	2	1.8	81.5	42
1	14	9	4	7	4	6	2	4	7	6	7	6	1	3	1	2	2	3	2	2	3	2	2	3	2	2	2	2	1	1.73	75.1	42
2	14	9	6	4	7	6	6	4	5	6	7	5	3	4	2	5	4	4	3	3	3	3	5	4	2	4	4	3	3	1.61	66.6	41
2	15	9	4	4	5	4	4	6	7	6	6	6	6	6	2	3	3	3	3	4	4	4	5	5	4	4	5	4	1	1.67	62.4	45
2	14	9	6	3	3	3	1	5	5	4	5	5	4	2	1	5	2	2	1	2	1	3	2	3	2	2	2	2	1	1.63	68.8	41
2	15	9	7	6	6	6	6	6	7	7	6	7	6	5	4	7	7	4	3	4	3	4	3	4	2	3	4	4	1	1.71	64.1	55
1	14	9	2	6	6	6	2	4	2	4	5	3	2	6	4	4	3	3	2	4	3	3	5	5	5	3	5	5	1	1.73	67	48
1	14	9	5	6	5	5	4	5	7	7	6	7	6	6	3	3	2	3	2	3	3	4	4	2	2	4	4	4	1	1.86	112	57
1	14	9	6	6	7	7	6	7	7	7	7	1	7	6	1	1	4	4	3	4	3	4	4	4	5	3	4	5	1	1.71	104.1	41
1	14	9	5	6	5	6	4	4	6	4	7	3	6	4	5	5	3	3	3	3	4	3	5	4	4	4	3	4	1	1.52	47.3	45
1	14	9	5	6	3	6	4	4	5	5	6	6	6	4	2	2	2	4	3	2	3	3	4	4	4	3	4	4	1	1.75	73.4	35
1	14	9	5	6	4	6	6	4	7	6	7	6	6	5	4	4	4	3	2	3	3	3	3	3	2	3	3	3	1	1.61	88	34
1	14	9	7	6	5	6	5	7	7	5	6	6	6	6	4	5	5	3	4	3	3	3	5	2	4	4	4	4	1	1.72	61.9	37
2	11	6	3	5	2	6	3	4	6	4	6	4	2	2	1	4	1	4	4	4	4	4	5	5	5	5	5	5	1	1.47	35.8	42
1	11	6	6	7	5	7	1	6	5	1	7	2	7	6	1	5	1	4	3	3	3	4	5	4	4	4	2	4	1	1.42	29.5	41
1	13	6	3	7	3	7	5	2	1	1	5	1	7	5	1	1	7	4	3	4	4	2	5	5	5	4	5	5	3	1.5	46.1	45
1	11	6	6	2	3	3	3	7	2	5	5	6	5	3	2	2	2	4	3	4	3	4	4	5	4	4	4	4	1	1.58	54.7	60
1	11	6	5	7	6	5	6	4	7	4	4	3	5	4	2	4	6	4	3	4	3	4	5	5	5	5	5	5	1	1.53	47.7	55
1	12	6	7	5	6	5	3	2	6	3	6	3	7	3	1	2	2	4	4	4	3	4	5	3	5	4	5	5	3	1.56	70.2	42
2	11	6	3	6	4	6	5	6	7	6	6	6	4	3	3	4	3	3	3	4	4	3	4	4	3	4	4	4	2	1.45	40.6	52
2	12	6	1	6	2	7	5	4	7	1	7	6	1	1	1	6	4	3	3	2	2	2	5	5	5	4	4	4	3	1.68	96.4	999
2	11	6	2	3	4	2	4	3	2	1	3	4	2	2	1	1	1	1	1	3	2	3	1	2	1	1	1	1	1	1.49	56.2	23
2	12	6	3	5	1	4	6	3	3	2	6	3	4	5	1	3	7	3	2	3	2	3	4	4	2	2	4	4	3	1.46	49	27
2	12	6	4	6	2	5	3	4	7	5	6	4	6	3	4	4	4	3	3	4	3	3	5	5	5	4	4	4	3	1.61	67.6	33
2	11	6	7	3	6	4	7	3	5	5	7	1	7	6	1	5	7	4	4	4	4	1	5	5	5	5	5	5	1	1.48	36.7	61
2	11	6	3	4	4	5	4	4	7	4	5	2	3	3	5	4	5	2	2	3	2	3	3	4	4	4	4	4	1	1.53	40.2	33
2	12	6	1	6	6	6	7	999	7	6	6	999	3	3	1	2	6	4	3	4	4	3	4	4	4	4	4	4	1	1.52	43.6	33
1	12	6	6	7	6	7	7	7	7	2	7	5	3	6	1	2	7	3	4	4	3	4	5	5	5	5	3	3	1	1.49	36	42
1	13	6	6	6	6	7	7	7	7	3	7	7	4	7	1	1	4	4	4	3	4	4	5	4	5	5	5	5	1	1.55	44.1	45
1	11	6	7	5	6	4	4	7	7	3	7	6	5	5	1	4	2	4	4	4	4	4	5	5	5	5	5	5	1	1.46	36.3	42
1	11	6	5	6	6	4	4	6	3	3	6	7	4	6	2	2	5	3	3	2	3	3	4	4	4	3	2	2	3	1.6	56.8	27
1	11	6	5	5	3	5	5	5	6	6	5	3	5	6	2	2	5	2	2	2	2	3	2	3	2	1	2	2	1	1.39	36.3	70
2	12	6	3	5	4	6	6	6	7	4	7	4	4	4	3	4	4	3	3	4	4	4	3	5	5	4	4	4	1	1.42	27.6	50
2	12	6	7	6	6	7	5	7	7	5	7	6	6	5	4	5	5	4	3	4	4	4	5	4	5	3	5	4	1	1.58	40.1	70
2	11	6	6	6	6	6	7	6	7	3	7	3	7	5	3	5	7	3	2	3	2	3	4	5	5	4	4	5	1	1.45	40.2	49
1	12	6	4	7	7	4	4	4	7	6	7	4	4	4	4	4	7	4	3	3	4	4	4	3	4	3	2	3	2	1.62	68.8	999
2	11	6	6	7	7	7	7	7	7	7	7	7	6	7	5	5	6	4	3	4	4	4	5	5	5	5	5	5	1	1.49	45.9	50
2	11	6	2	6	5	7	7	4	7	5	7	5	1	6	1	4	6	4	1	4	4	4	4	4	5	5	5	5	2	1.51	54	33
1	11	6	3	3	2	5	4	5	7	5	3	5	5	5	1	1	3	4	2	3	3	4	4	3	4	4	4	4	1	1.45	49	42
1	11	6	4	5	3	5	5	5	7	6	7	6	3	4	1	2	6	2	3	1	2	2	2	1	1	1	1	1	2	1.5	49.7	38
1	12	6	7	7	5	6	7	4	7	7	7	7	7	6	7	5	6	4	3	4	4	4	5	5	5	5	5	5	3	1.55	51.2	85
1	11	6	7	7	5	6	7	4	7	7	7	7	7	6	7	5	6	4	2	4	4	4	5	5	5	5	5	5	1	1.4	29.9	41
1	12	6	4	7	5	5	7	5	5	6	6	5	6	6	4	4	4	3	3	4	4	4	5	5	5	5	5	5	1	1.51	39.5	32
1	11	6	5	4	4	2	4	4	7	5	5	5	5	4	1	3	2	3	2	4	3	3	4	4	5	4	4	4	2	1.46	50.8	37
1	11	6	6	6	7	7	6	5	7	2	7	5	4	3	2	5	3	3	3	2	4	4	5	5	5	5	5	5	3	1.4	45.8	56
1	999	6	5	5	5	5	6	6	7	6	6	6	5	5	2	4	5	4	3	4	4	4	5	5	5	5	5	5	1	1.52	38.5	26
1	12	6	4	6	5	7	7	5	1	7	7	7	7	6	6	6	7	4	4	4	4	999	5	5	2	5	5	1	1	1.42	38.5	35
2	999	7	6	6	6	5	6	5	7	5	7	5	6	5	5	5	7	3	2	2	3	4	5	5	5	5	5	5	3	1.6	49.8	23
2	12	7	5	6	6	7	6	4	6	4	6	4	6	5	2	6	5	3	2	4	4	4	3	4	2	3	3	3	1	1.56	60.9	33
2	12	7	7	6	6	7	6	7	7	3	6	6	7	4	4	5	7	3	3	4	4	4	5	5	5	3	5	4	1	1.63	63.7	50
1	13	7	7	7	7	7	7	7	7	999	7	7	7	999	7	7	6	3	1	2	4	3	5	5	1	1	1	999	2	1.53	62.5	44
1	13	7	3	4	3	4	6	4	7	2	7	5	6	6	1	6	6	3	3	4	4	3	5	5	5	5	5	5	3	1.69	55.1	29
1	12	7	7	4	6	7	7	5	7	7	7	7	7	3	1	4	4	4	3	2	4	4	5	5	5	5	5	5	3	1.7	48.2	27
1	12	7	3	4	2	4	4	5	7	2	7	2	6	4	2	4	4	2	1	2	2	2	3	2	2	1	2	1	1	1.52	37.9	40
1	12	7	3	7	3	5	6	5	7	5	7	5	4	5	2	4	3	4	3	4	3	4	5	3	5	5	5	5	2	1.83	81.6	27
1	12	7	7	6	7	7	7	6	7	2	7	2	7	7	1	4	7	4	4	4	4	4	5	5	5	5	5	5	1	1.58	69.4	26
1	12	7	5	7	2	6	3	5	7	3	6	2	6	5	2	3	2	3	3	2	3	3	4	3	3	2	3	4	3	1.54	36.3	33
1	13	7	6	6	6	7	6	7	7	6	7	6	6	7	1	4	4	4	1	4	2	3	5	5	5	4	4	4	3	1.67	48.3	32
1	12	7	7	7	6	6	7	7	7	5	7	7	7	6	3	7	7	4	4	4	3	4	5	5	5	5	5	5	1	1.6	65.3	43
2	12	7	7	4	1	3	1	5	6	3	1	1	4	4	2	2	1	4	3	3	2	3	3	5	3	1	3	2	3	1.47	39.7	45
2	14	7	6	4	5	4	5	4	5	5	6	4	5	6	3	5	6	2	1	2	2	3	4	4	4	2	4	4	1	1.65	51.2	999
2	13	7	7	2	2	3	4	3	4	4	4	2	4	4	1	3	1	3	1	2	2	2	2	4	3	3	3	2	2	1.63	83.3	43
1	13	7	6	6	6	5	6	5	6	3	7	999	6	5	3	3	3	3	3	3	4	3	4	4	5	4	4	4	1	1.57	57.5	33
1	13	7	6	4	4	2	5	6	7	6	7	6	4	3	1	2	3	4	3	4	4	4	5	4	5	2	2	4	3	1.58	49.6	37
1	13	7	6	7	6	6	7	6	7	6	7	6	6	6	6	7	7	4	4	4	4	4	5	5	5	5	5	5	1	1.68	84.2	49
1	13	7	7	6	7	7	7	6	7	5	7	7	6	5	2	6	6	4	4	4	4	4	5	5	5	5	5	5	1	1.7	64.5	45
1	13	7	6	7	7	7	7	6	7	5	7	7	7	7	3	5	3	4	4	3	3	4	5	5	5	5	5	5	2	1.61	48.1	53
1	14	7	6	6	6	7	7	6	7	7	7	5	5	6	5	6	5	3	4	3	3	2	5	5	5	5	5	5	2	1.53	42.3	34
1	12	7	6	5	4	7	7	6	7	4	7	6	7	4	2	6	3	4	3	4	4	3	5	4	5	2	2	5	2	1.7	69.8	89
1	14	7	4	6	5	6	6	5	7	5	7	6	6	4	3	5	2	4	4	3	3	3	5	4	5	5	5	5	2	1.52	36.1	33
2	13	7	7	4	3	5	4	4	2	7	4	4	6	1	1	1	1	3	2	3	1	3	1	3	5	1	3	1	1	1.43	43.6	40
2	13	7	7	5	3	4	5	6	7	3	5	2	6	5	2	3	3	4	3	4	3	4	5	4	5	5	5	5	1	999	999	17
2	13	7	5	6	5	6	4	6	7	6	6	6	5	6	5	5	5	3	3	3	3	3	4	5	4	2	4	2	1	1.67	57.6	69
2	13	7	6	5	4	5	6	5	7	4	7	6	5	3	3	4	4	3	3	3	3	4	5	5	4	4	4	5	1	1.55	45.2	32
2	12	7	7	6	2	3	1	4	7	1	4	1	5	3	1	1	1	3	3	3	2	2	5	4	4	3	3	3	1	1.48	41.8	38
2	13	7	6	6	5	6	5	5	7	5	6	5	5	6	3	6	6	3	3	3	3	3	3	3	4	4	3	3	1	1.55	43.9	27
2	12	7	5	6	4	3	4	5	6	5	7	2	3	3	3	4	3	3	2	3	2	3	3	3	3	3	3	2	1	1.54	45.3	43
2	14	7	3	7	5	7	5	1	7	5	7	5	5	3	1	1	1	4	2	2	3	4	5	4	5	4	4	4	1	1.56	45.8	41
1	13	7	3	5	2	6	1	5	7	1	5	1	3	4	1	1	1	2	2	3	3	1	2	3	2	1	2	2	1	1.67	48.3	26
1	13	7	4	4	4	5	4	5	6	6	6	5	5	4	3	5	4	3	2	3	2	3	3	2	4	3	3	3	1	1.61	74.4	999
2	12	7	3	6	6	6	7	5	7	6	7	3	4	3	4	3	5	4	3	4	3	2	4	5	3	4	4	4	3	1.66	84.2	43
1	14	7	5	6	5	4	5	4	7	7	7	6	3	4	2	2	1	3	3	3	2	3	4	4	2	4	4	3	3	1.67	58.8	70
1	12	7	3	6	3	6	5	5	7	7	7	6	4	5	1	2	2	3	3	3	3	2	4	5	5	4	4	4	1	1.59	64.2	41
1	12	7	5	4	2	3	4	5	7	7	6	7	3	5	1	1	1	3	2	3	3	2	4	2	2	1	2	2	1	1.52	38.8	41
1	12	7	3	4	2	2	4	1	5	1	6	1	2	1	1	3	1	1	2	2	1	1	3	2	4	2	3	3	1	1.54	57.6	42
1	12	7	1	4	1	2	2	3	6	3	3	2	2	2	1	2	2	2	2	3	2	3	2	3	2	3	2	3	1	1.5	46.6	26
1	13	7	6	7	4	5	5	7	7	6	7	7	5	5	1	7	6	4	3	3	4	4	4	5	2	3	4	4	1	1.64	56.2	43
1	12	7	5	6	5	6	6	6	7	7	7	7	6	5	3	2	6	3	3	999	2	4	5	4	4	5	5	5	1	1.48	44.7	33
2	14	8	3	3	4	4	4	5	5	5	6	6	3	2	1	2	2	2	1	2	2	3	5	4	3	2	2	2	1	1.72	85	33
2	13	8	5	2	3	2	3	3	2	2	3	2	3	2	1	1	3	2	1	2	2	1	2	3	3	2	2	2	3	1.61	71	33
2	13	8	4	6	4	2	4	4	7	7	7	5	3	5	1	4	2	3	3	4	3	3	4	5	4	3	3	3	3	1.47	44.2	32
2	14	8	5	3	3	5	4	4	7	7	7	4	6	4	1	2	2	4	3	3	4	3	5	5	3	3	5	4	3	1.62	61.2	42
2	14	8	2	2	1	2	3	4	6	5	5	5	2	5	1	2	1	3	3	3	3	3	4	3	4	3	3	3	3	1.56	50.4	21
2	13	8	2	4	3	5	5	2	4	4	5	4	5	4	2	4	4	3	2	3	3	3	4	4	3	3	3	2	1	1.7	65.8	33
2	15	8	4	4	3	4	6	6	7	5	6	6	4	4	1	4	1	4	4	2	3	3	5	999	3	999	999	4	2	1.57	52.4	48
1	14	8	6	7	7	7	7	7	7	5	7	5	6	7	6	7	6	4	4	4	3	4	4	5	4	5	5	5	2	1.73	67.7	26
1	13	8	6	7	4	7	6	7	7	4	7	4	7	6	4	4	7	4	3	4	4	4	5	5	5	3	3	5	1	1.57	78.7	26
1	14	8	6	6	6	6	3	5	7	6	6	6	6	3	3	6	3	4	3	3	4	3	5	5	5	1	2	1	2	1.57	64.9	55
1	14	8	5	7	6	6	5	6	7	5	6	4	6	6	5	5	3	3	4	4	3	4	5	5	5	4	4	4	1	1.6	50.8	26
1	14	8	6	6	5	6	7	7	7	3	6	3	7	5	4	6	7	3	3	4	4	3	5	5	5	4	4	4	1	1.65	45.7	32
1	14	8	6	7	7	7	6	6	7	5	6	5	6	5	4	4	5	4	3	4	4	4	5	5	5	5	5	5	1	1.62	57.1	42
1	14	8	2	6	5	6	6	2	7	3	7	6	5	4	2	2	2	3	2	3	4	3	5	4	5	4	5	4	1	1.64	57.5	41
1	14	8	6	6	6	6	7	6	7	6	7	5	7	5	5	6	5	3	3	3	3	4	5	4	4	4	4	4	1	1.69	65.7	29
1	14	8	5	5	7	5	4	6	6	6	6	4	4	999	4	4	3	2	2	1	2	3	2	2	3	2	2	3	2	1.65	74.9	36
2	14	8	4	5	1	3	4	4	7	1	5	1	1	1	1	3	1	2	2	1	1	3	1	3	1	2	2	2	1	1.59	44.2	42
2	13	8	4	7	4	7	4	4	7	1	6	1	1	4	1	4	1	2	2	3	4	3	2	4	5	3	3	5	1	1.59	64	41
2	14	8	3	5	1	7	1	3	1	1	3	1	6	2	1	1	1	2	1	1	3	4	5	5	5	2	2	2	2	1.58	41.1	48
1	14	8	6	6	4	4	7	7	7	7	7	6	4	6	2	5	2	1	3	1	2	4	5	5	5	5	3	5	2	1.66	51.2	48
1	13	8	5	7	4	7	7	4	6	6	6	4	6	5	2	1	1	4	4	4	4	3	5	4	4	5	5	5	1	1.63	53.5	29
1	14	8	1	2	1	2	4	1	6	2	3	6	2	2	2	2	2	4	4	4	4	4	5	5	5	5	1	1	1	1.72	64.7	41
1	14	8	5	7	6	7	7	7	7	6	7	7	4	7	2	5	2	4	4	3	3	2	5	5	5	5	5	5	2	1.8	60.9	48
1	14	8	6	5	4	5	5	5	7	5	7	6	3	4	3	2	4	3	2	3	3	3	4	3	3	2	3	3	1	1.7	79.5	29
1	14	8	5	6	7	6	7	7	7	7	7	7	3	3	1	1	7	4	4	4	4	4	5	5	5	4	5	5	3	1.64	69.1	32
1	14	8	3	4	3	6	4	4	3	3	5	6	4	4	4	4	1	3	2	4	3	4	5	4	5	3	5	3	1	1.49	34.7	33
1	14	8	3	7	6	7	6	4	6	7	7	6	6	6	1	2	1	4	1	4	3	2	5	4	4	4	4	5	1	1.6	46	51
1	14	8	7	5	6	7	7	2	7	3	6	7	1	1	1	1	2	4	4	4	3	4	5	5	4	5	5	5	1	1.58	49.3	26
1	13	8	5	4	4	4	6	3	7	6	5	6	4	5	1	1	1	2	2	3	1	2	2	3	2	2	3	2	1	1.72	94.8	41
1	13	8	5	2	3	5	6	3	6	7	7	7	7	6	5	2	3	4	4	4	4	4	5	5	5	5	5	5	1	1.64	53.4	62
1	13	8	2	4	1	1	2	2	7	6	2	7	2	1	1	1	2	4	3	4	3	2	3	3	2	3	3	3	1	1.58	48.3	57
1	14	8	2	1	1	1	5	2	7	4	5	4	2	1	1	4	1	4	3	4	3	3	5	5	5	3	5	5	1	1.47	39.2	50
2	14	8	5	6	2	2	3	3	6	6	6	2	2	2	1	2	3	3	2	2	2	2	3	4	3	2	2	2	1	1.7	82.1	42
2	14	8	5	4	3	4	4	4	7	6	7	6	3	6	2	3	4	3	3	2	3	3	3	5	3	2	2	2	1	1.65	69.8	41
2	14	8	2	1	1	1	1	1	1	4	4	1	4	2	1	1	1	1	2	1	3	3	3	4	3	3	3	3	1	1.79	72.1	53
2	13	8	2	1	1	1	1	1	1	6	1	2	4	2	1	1	1	1	2	1	3	3	1	1	1	1	1	1	1	999	999	50
2	14	8	2	4	1	1	4	1	3	5	6	6	1	1	1	4	3	4	1	2	1	3	3	3	3	3	3	2	2	999	999	41
1	14	8	6	4	5	6	6	6	7	5	7	4	6	6	3	5	2	3	4	3	3	3	5	4	3	3	4	5	1	1.72	51	42
1	14	8	6	7	7	7	7	6	7	7	7	7	5	7	4	4	7	4	4	4	4	4	5	5	5	5	3	3	1	1.79	64.1	54
1	13	8	4	6	6	7	5	5	6	4	7	4	5	6	4	5	4	3	4	3	4	4	3	4	4	3	4	4	1	1.68	60.4	47
1	13	8	6	5	4	5	4	7	4	6	7	7	4	3	1	4	4	3	3	2	3	3	2	4	2	1	2	2	1	1.68	53.8	50
1	18	8	5	7	7	7	7	4	7	3	7	6	1	7	1	3	1	4	4	4	4	3	4	3	1	4	4	4	1	1.54	37.2	70
1	15	8	5	6	5	7	4	5	6	4	6	3	4	4	3	4	2	3	2	3	1	3	3	2	2	2	2	3	1	1.85	58.7	85
1	13	8	6	6	6	6	7	5	6	6	5	3	5	6	7	4	7	4	4	3	4	4	2	5	5	4	4	5	1	1.62	52.7	36
1	14	8	6	7	4	7	7	5	6	7	5	7	4	6	3	5	4	4	4	3	4	3	4	5	5	5	5	5	1	1.69	55	68
1	14	8	6	6	4	4	6	6	7	5	6	4	6	7	3	4	3	3	3	3	4	3	3	3	3	3	4	4	3	1.65	77.6	41
1	14	8	6	5	4	4	4	6	7	6	7	6	7	7	1	4	4	3	4	4	4	3	5	5	5	5	4	5	1	1.65	66.8	32
1	14	8	6	6	4	6	6	6	6	6	6	4	6	6	4	6	4	4	4	4	4	4	4	5	5	5	5	5	3	1.73	57.9	35
1	14	8	5	6	5	7	7	6	7	4	6	999	5	5	3	2	3	3	2	999	4	4	4	3	4	4	5	4	1	1.68	81.4	39
1	14	8	4	4	4	4	4	4	4	4	5	4	5	6	4	4	5	2	1	1	1	2	1	1	1	1	1	1	1	1.8	101.2	999
1	14	8	6	6	6	6	7	6	7	6	6	2	7	6	3	3	2	4	3	2	3	3	5	3	4	3	4	4	1	1.87	103.2	33
2	14	9	5	5	4	5	6	5	7	3	7	3	4	2	1	2	1	4	3	4	4	4	4	5	4	5	5	4	1	1.65	46	27
2	15	9	5	7	6	5	4	2	7	6	6	4	6	5	2	3	3	4	3	3	3	3	4	3	4	2	4	4	1	1.67	79.8	49
2	14	9	4	6	6	4	1	4	7	7	6	2	7	6	1	1	1	4	4	4	4	4	3	4	5	4	5	5	1	1.55	43.3	45
2	14	9	6	4	5	3	6	4	7	3	6	4	6	4	3	2	1	4	2	3	2	4	5	5	4	5	5	5	1	1.8	73.8	40
1	15	9	6	2	1	7	3	3	6	4	4	4	4	2	1	4	5	2	2	3	3	3	2	3	2	3	3	2	2	1.62	115	42
1	14	9	7	7	7	7	7	7	7	6	7	5	6	5	7	5	5	3	3	3	4	4	5	5	4	4	5	5	1	1.72	60.9	27
1	14	9	6	6	4	5	7	6	7	5	6	4	4	5	3	6	7	4	4	4	4	4	4	5	4	4	4	4	1	1.71	61.1	60
1	14	9	4	4	4	3	7	6	7	6	7	1	2	6	1	1	6	4	4	4	4	4	5	5	5	4	5	4	1	1.65	53.6	45
1	14	9	4	6	4	6	6	6	5	3	7	6	6	6	2	7	3	3	2	3	4	4	4	2	4	3	4	3	1	1.65	68	55
1	15	9	6	7	6	6	5	6	7	6	7	6	7	6	5	5	4	3	3	4	3	3	3	4	4	4	4	4	2	1.75	89.1	36
1	15	9	7	7	7	5	7	6	7	6	7	4	4	6	4	7	7	4	3	4	4	4	5	5	5	5	5	5	2	1.66	59.1	36
1	16	9	7	7	7	7	7	6	7	5	7	7	6	6	4	5	5	4	4	4	4	4	5	5	5	5	5	5	1	1.85	79.3	33
1	14	9	7	3	7	6	6	5	5	4	7	3	6	5	1	3	3	3	1	2	1	4	5	5	2	1	2	3	1	1.77	107	40
1	15	9	5	6	4	3	2	6	4	2	2	1	6	5	1	4	3	4	3	999	3	4	3	4	4	3	4	3	1	1.73	71.5	49
1	14	9	7	7	6	7	6	7	7	5	7	3	7	5	2	5	2	4	2	999	999	4	5	5	5	5	5	5	1	1.78	73.1	42
1	15	9	4	1	2	3	1	2	6	4	6	2	4	4	1	2	1	4	3	3	3	4	5	4	4	3	4	3	1	1.6	54.3	40
1	15	9	5	7	4	6	4	5	7	6	7	3	5	4	2	6	6	3	2	3	3	3	4	3	3	2	2	3	1	1.79	94.7	31
2	14	9	6	6	6	6	4	6	7	5	7	5	5	5	4	4	3	3	2	3	2	3	2	4	2	2	3	2	1	1.68	57.2	33
2	15	9	7	6	6	6	7	6	7	7	7	7	7	6	4	5	4	3	3	4	2	3	5	2	4	4	5	5	2	1.52	51.2	32
2	16	9	4	5	4	3	5	5	7	6	4	6	4	4	4	3	3	3	2	3	2	4	4	3	4	4	4	5	3	1.63	72.3	999
1	14	9	6	5	5	6	7	5	7	2	7	7	3	5	4	7	7	4	3	4	4	4	4	4	5	4	4	4	1	1.56	51.3	53
1	14	9	6	6	4	5	2	3	5	3	3	4	3	5	5	7	4	4	3	3	3	3	4	5	999	4	3	2	1	1.69	51.9	70
1	16	9	6	6	6	7	6	5	7	6	5	6	6	5	6	7	5	3	4	3	3	4	4	5	4	5	5	5	2	1.75	68.4	999
1	14	9	5	6	5	6	4	6	6	4	6	4	3	3	4	5	3	4	3	3	3	4	5	5	4	5	5	5	1	1.58	46.3	48
1	15	9	6	5	5	5	7	4	7	3	6	6	4	4	2	4	4	3	3	4	3	4	3	3	3	3	3	3	1	1.78	76.9	66
1	14	9	5	7	5	6	2	5	7	7	6	7	4	3	2	6	2	3	2	2	3	3	4	4	4	2	2	3	1	1.82	103.4	41
1	14	9	6	6	5	6	1	5	7	6	7	6	7	6	1	7	1	2	1	1	1	1	1	3	1	2	2	2	1	1.75	80.6	45
1	16	9	7	7	7	7	7	7	7	7	7	7	5	4	1	4	4	4	4	4	4	4	5	3	5	3	4	4	1	1.61	62.9	999
1	14	9	5	4	4	6	6	5	3	6	6	7	4	5	4	5	4	4	2	4	3	4	5	5	5	5	5	5	1	1.71	62.9	45
1	14	9	5	6	4	6	3	6	6	5	5	4	4	6	2	5	3	4	4	4	4	3	4	5	5	5	5	5	3	1.81	67.1	68
1	14	9	6	5	4	5	2	5	7	7	6	6	2	4	2	4	2	2	1	1	2	2	1	1	3	1	3	4	3	1.65	47.1	33
1	15	9	6	6	2	1	5	5	7	4	7	6	6	5	1	4	4	3	2	2	3	3	3	3	3	3	4	2	1	1.66	61.5	41
2	14	9	6	5	5	6	6	6	6	6	6	5	6	6	3	3	3	3	1	3	3	4	2	2	1	1	2	4	1	1.63	61.6	41
2	15	9	3	5	3	4	5	4	7	6	7	6	6	6	1	2	4	3	2	1	2	3	2	3	2	1	3	2	1	1.72	58.1	26
2	15	9	1	4	3	2	3	3	6	3	2	3	4	3	1	3	2	3	4	3	3	3	3	2	3	3	3	3	1	1.65	62.6	53
1	15	9	3	7	3	6	5	4	5	1	7	3	5	4	1	4	2	3	2	3	3	2	3	3	3	2	3	3	1	1.77	55.1	39
1	14	9	4	6	5	3	6	3	2	3	7	6	3	3	3	3	3	3	4	4	4	4	5	5	5	5	5	5	1	1.77	92.5	70
1	15	9	5	4	5	7	4	3	3	5	5	2	4	4	6	1	4	2	3	2	3	3	1	1	1	1	1	3	1	1.8	58.8	41
1	15	9	6	7	7	7	7	7	6	5	7	6	5	6	4	6	7	4	3	4	3	3	4	5	4	5	4	5	1	1.81	64.7	41
1	15	9	6	7	6	5	4	6	7	7	6	6	3	1	1	2	2	4	4	4	4	3	4	4	2	4	4	5	1	1.65	53.3	66
1	14	9	5	7	6	5	5	5	1	5	7	3	6	6	6	6	5	3	3	3	4	3	4	5	4	3	4	4	1	1.7	48.3	32
1	14	9	6	7	4	6	6	5	7	7	7	6	7	6	3	6	3	4	3	3	4	4	5	5	5	4	5	1	1	1.88	78.4	38
1	16	9	4	7	4	7	5	6	7	6	5	6	5	6	1	5	4	4	3	4	3	4	5	4	4	5	5	4	1	1.75	60	89
1	16	9	4	7	5	7	4	5	4	2	7	4	1	4	2	4	5	4	2	3	2	4	5	5	5	4	5	4	3	1.79	71.8	43
1	14	9	6	7	7	6	7	7	6	3	7	6	6	3	1	5	3	3	2	4	4	3	5	4	4	2	2	3	1	1.79	96.5	31
2	12	6	5	3	3	4	3	2	3	3	4	3	5	5	1	3	1	3	3	4	4	2	4	4	4	4	4	4	2	1.53	42.3	49
2	13	6	1	1	1	4	1	3	6	2	6	4	3	3	3	2	1	2	1	1	3	3	1	3	3	1	1	1	2	1.55	53.7	999
2	13	6	6	5	4	5	2	4	3	3	7	4	7	3	3	5	6	2	2	3	2	4	2	3	4	3	3	4	3	1.64	80	34
2	11	6	1	1	1	2	2	1	2	2	3	2	6	1	2	6	2	4	4	4	4	4	4	5	3	2	3	1	3	1.5	40.3	48
2	13	6	1	1	2	6	1	3	7	1	7	1	1	1	1	4	7	2	1	1	1	2	1	1	1	1	1	1	2	1.64	51	38
2	12	6	4	3	3	5	4	5	6	4	6	5	5	5	3	5	6	3	2	3	3	4	2	4	3	3	3	2	2	1.66	53.4	41
2	12	6	3	1	1	2	1	2	6	2	4	1	2	4	3	2	1	1	2	3	3	4	1	4	1	1	2	2	1	1.56	63.1	73
2	12	6	2	2	1	2	1	1	1	1	1	1	4	2	2	1	1	3	2	3	3	3	1	3	2	1	1	1	3	1.55	71.7	53
1	13	6	6	7	7	7	7	7	7	7	7	5	6	6	3	4	4	4	4	4	4	4	5	5	5	5	4	5	3	1.54	67.4	27
1	12	6	4	6	4	5	5	5	6	7	4	6	2	2	3	4	3	3	2	2	1	3	2	2	2	2	2	2	2	1.57	65.6	27
1	13	6	7	5	7	6	6	7	7	6	7	7	6	6	4	4	6	4	4	3	4	3	5	4	5	5	5	5	3	1.75	89.2	18
1	12	6	5	1	1	7	7	1	7	7	7	4	1	1	4	1	1	4	1	4	3	2	3	5	4	5	5	3	2	1.46	32.6	33
1	12	6	4	3	4	3	4	999	5	6	6	4	999	3	2	3	2	3	3	4	3	3	1	1	3	3	2	2	2	1.45	37.2	42
1	12	6	7	4	3	6	7	6	7	5	999	7	6	7	1	999	1	4	4	4	4	4	4	4	3	3	4	5	2	1.51	41.9	26
2	13	6	7	6	1	7	3	999	7	1	3	6	7	1	1	1	2	1	4	2	3	4	3	3	5	1	3	3	2	1.62	90	38
2	11	6	5	2	2	4	1	5	7	6	2	1	4	4	4	4	1	3	2	1	4	4	5	5	5	5	5	5	3	1.44	45.5	42
2	12	6	4	3	3	7	5	4	7	2	3	4	6	4	1	4	3	2	2	3	4	4	4	5	5	4	4	4	2	1.58	50.2	43
2	11	6	4	6	3	6	7	3	6	1	4	2	5	4	1	4	4	3	1	3	2	4	4	5	5	4	4	4	1	1.42	34.9	33
1	13	6	6	4	6	4	7	6	7	5	5	3	4	6	3	5	2	4	3	4	3	2	5	5	5	5	5	5	2	1.54	47.4	52
1	12	6	6	5	6	6	5	7	7	6	7	5	4	5	4	4	4	4	3	3	4	3	5	5	5	5	5	5	1	1.48	33.3	69
1	12	6	7	7	7	7	7	4	7	1	7	999	1	3	1	5	7	3	4	4	2	3	3	5	3	5	5	5	3	1.5	47.4	33
1	12	6	7	7	7	7	7	4	7	6	7	7	6	5	4	7	4	4	3	4	4	4	4	3	5	4	3	5	1	1.59	46.4	37
1	11	6	4	6	6	7	5	6	7	7	7	4	5	4	7	7	6	3	3	4	4	3	3	3	3	3	5	5	2	1.5	49.5	32
1	12	6	3	7	6	6	6	6	7	5	7	3	2	5	1	2	2	4	2	4	3	4	5	5	5	5	5	5	2	1.46	46	17
1	11	6	6	4	4	3	4	5	7	6	6	7	3	5	2	5	4	3	2	3	2	3	4	3	3	4	3	3	2	1.58	56.6	17
1	12	6	6	6	2	4	4	4	7	7	4	6	6	2	1	4	4	4	1	1	4	1	5	5	5	5	5	5	2	1.49	50.6	38
1	12	6	6	7	6	7	6	4	7	6	7	5	5	6	3	3	4	3	2	1	1	2	3	3	3	3	3	3	1	1.56	79.3	68
1	12	6	6	7	7	999	4	4	5	3	4	2	7	4	3	2	2	4	2	4	4	4	5	5	4	3	3	3	3	1.64	999	51
1	11	6	6	6	4	6	7	6	7	7	4	2	4	4	1	4	1	4	4	4	4	4	5	5	5	5	5	5	3	1.44	35.3	48
2	12	7	4	5	1	6	2	5	7	4	4	4	3	3	1	5	2	3	2	2	4	3	4	4	4	4	4	4	2	1.58	50.6	17
2	12	7	7	7	7	7	6	7	7	7	7	7	7	6	5	999	7	2	4	3	3	3	4	4	4	4	4	5	3	1.61	45.1	34
2	13	7	7	5	7	6	6	7	7	7	7	6	7	6	5	2	6	2	3	4	3	2	4	4	4	4	4	4	1	1.53	36.7	38
2	12	7	6	7	5	5	7	7	4	5	7	6	6	4	3	4	3	4	4	3	3	4	5	4	4	4	4	4	1	1.5	48.8	41
2	13	7	5	5	6	7	7	5	6	7	5	7	1	999	5	5	5	4	3	4	4	4	5	5	5	5	5	4	2	1.6	51.9	999
2	12	7	7	6	3	6	7	7	6	4	7	4	4	4	3	4	4	3	2	3	4	4	3	4	2	3	5	4	3	1.48	43.9	26
2	12	7	6	4	6	7	6	6	7	7	7	2	4	4	4	5	4	2	2	4	3	4	5	3	4	2	4	5	3	1.59	41.1	34
2	12	7	3	1	1	1	4	4	6	1	4	7	1	4	1	1	7	2	3	4	4	3	5	4	4	5	5	4	3	1.6	51.8	41
2	12	7	5	7	6	7	6	6	7	3	6	2	7	7	7	7	5	3	3	2	5	5	4	4	4	2	3	2	3	1.64	92.2	36
1	13	7	6	6	4	5	6	6	7	5	6	6	7	5	2	2	4	3	3	3	3	4	3	5	4	4	4	4	2	1.71	66.4	17
1	13	7	5	7	5	5	6	6	7	6	7	6	5	6	2	4	2	4	4	4	3	4	5	999	5	5	5	5	2	1.7	75.6	33
1	12	7	6	4	7	4	4	6	7	4	7	3	3	7	1	3	4	4	4	4	4	4	5	5	5	5	5	5	2	1.7	78.4	33
1	14	7	7	5	6	7	7	7	7	7	7	6	6	6	5	5	4	4	4	3	4	4	4	4	4	3	4	4	2	1.67	53.1	27
1	13	7	7	7	7	7	7	4	7	7	7	7	7	4	2	4	4	4	4	2	4	4	3	3	2	3	2	3	2	1.64	81	52
1	12	7	6	7	6	2	7	7	7	6	7	1	3	6	1	6	1	3	2	2	3	3	4	5	2	4	5	5	1	1.55	78.3	53
1	13	7	5	7	4	7	6	7	7	7	7	7	7	6	1	1	1	2	3	4	4	4	5	5	5	5	5	5	3	1.63	79.6	42
1	13	7	5	4	6	7	5	5	7	4	7	7	7	3	1	4	4	4	4	4	3	4	5	999	5	5	5	5	3	1.75	54.7	36
1	12	7	6	5	2	7	5	5	7	4	7	6	6	6	1	1	2	3	2	4	4	4	5	4	5	4	4	4	2	1.72	59.3	38
1	12	7	3	7	6	6	7	6	2	1	7	2	4	4	2	2	4	4	4	3	4	4	5	5	5	5	4	4	3	1.54	46.4	33
2	12	7	3	3	2	5	6	3	4	5	5	2	5	3	2	2	2	2	1	3	1	1	2	2	1	2	2	2	1	1.49	42	42
2	12	7	5	5	6	5	3	6	7	6	5	1	6	5	2	7	2	4	2	4	3	3	4	5	4	4	4	5	3	1.61	46	33
2	12	7	4	6	7	5	5	5	7	6	7	6	6	6	4	6	5	3	2	3	3	3	3	5	4	999	3	3	3	1.6	63	20
2	13	7	6	3	5	6	2	3	7	4	6	2	3	4	1	1	3	4	2	3	1	4	2	2	2	1	1	1	1	1.58	79	48
2	13	7	5	5	3	4	5	5	4	3	5	2	5	5	3	5	3	3	2	2	2	3	3	2	2	2	2	4	2	1.69	62	48
2	12	7	2	5	2	3	2	2	1	1	6	1	6	4	1	1	2	4	3	4	4	4	5	5	5	5	5	5	2	1.53	44.3	33
2	14	7	6	6	5	6	5	5	4	6	5	4	7	4	3	4	4	3	2	3	3	3	5	5	3	3	3	3	2	1.51	57.1	33
2	12	7	3	3	3	7	4	4	5	1	3	2	3	2	1	1	7	4	4	4	4	4	5	5	5	5	5	5	2	1.55	45.8	999
1	14	7	6	6	5	7	7	7	7	7	7	4	5	5	4	5	7	4	4	4	4	4	5	5	5	5	5	5	2	1.64	53.9	55
1	13	7	5	7	6	7	5	5	7	4	7	4	1	1	1	6	3	4	3	4	3	2	5	5	3	5	5	4	1	1.62	51.6	42
1	13	7	5	5	4	5	5	7	7	5	6	5	5	5	4	4	5	4	3	4	3	4	5	5	5	5	5	5	2	1.65	58	48
1	14	7	4	6	4	5	5	5	6	5	5	5	4	6	6	6	4	3	3	3	2	3	5	5	3	4	3	3	3	1.69	91.1	17
1	13	7	4	2	3	2	7	5	6	4	7	2	4	2	1	4	1	3	2	4	4	4	3	1	5	3	5	3	3	1.58	66.2	27
1	12	7	4	6	2	6	1	5	5	6	5	2	5	3	1	4	1	4	4	3	4	4	3	5	4	4	5	4	3	1.54	52.5	53
1	15	7	7	6	6	6	5	7	7	1	6	1	7	2	2	3	1	3	2	4	4	1	1	1	5	1	1	1	2	1.7	75.1	43
1	13	7	7	7	7	7	7	7	7	6	7	7	7	6	4	4	6	4	3	4	4	4	5	4	5	3	5	3	1	1.62	70.8	33
1	14	7	7	7	7	4	7	6	7	6	7	5	7	6	4	7	7	4	4	3	4	4	5	5	5	5	5	5	2	1.72	67.5	49
2	13	8	4	6	5	5	1	7	7	5	5	5	3	4	1	1	2	4	2	4	3	2	3	2	1	2	3	4	3	1.67	52	17
2	13	8	4	6	4	4	4	5	6	2	1	1	4	5	5	1	1	3	4	4	3	4	3	4	2	4	5	5	1	1.6	57	55
2	15	8	5	5	5	7	4	5	7	5	7	5	5	5	3	5	1	3	2	3	3	4	4	5	2	4	4	3	1	1.57	39.4	999
2	13	8	6	5	7	7	4	5	7	6	5	3	5	5	2	4	5	3	2	3	3	4	4	3	4	4	4	4	1	1.7	57.7	27
2	16	8	5	6	7	7	7	3	6	5	7	3	5	7	3	5	3	4	3	4	4	4	4	4	4	4	4	4	2	1.52	56.9	999
2	14	8	3	5	4	5	5	5	6	5	6	3	3	3	2	3	3	3	3	3	3	3	4	5	3	4	4	4	2	1.55	50.8	999
1	13	8	6	6	7	5	5	4	7	5	5	2	5	6	2	3	2	3	3	4	2	4	2	5	3	2	4	3	1	1.56	45.9	38
1	14	8	5	5	1	4	6	6	7	2	7	7	3	1	1	1	5	3	1	4	2	4	1	2	4	2	2	2	2	1.65	95.6	999
1	13	8	5	6	6	5	4	6	7	5	6	5	4	4	3	4	4	4	4	4	4	4	3	3	3	2	3	2	3	1.71	89.6	26
1	15	8	4	6	4	6	6	6	7	7	5	6	4	4	2	3	2	4	4	3	4	4	5	5	5	5	5	5	3	1.55	45.2	36
1	14	8	6	7	5	7	5	5	2	6	6	5	5	4	2	5	3	3	3	4	3	4	4	5	4	5	5	5	3	1.69	82.4	35
1	15	8	6	6	6	7	5	5	3	6	5	6	6	6	3	4	6	4	3	4	4	4	3	5	5	3	4	3	1	1.66	58.9	53
1	14	8	6	7	5	7	7	6	7	6	6	7	7	6	4	7	6	4	3	3	4	4	4	3	4	3	3	4	1	1.74	100	57
1	14	8	6	5	5	6	2	5	5	6	2	2	4	4	4	2	2	3	3	3	3	3	5	5	5	4	4	5	1	1.6	78.2	55
1	14	8	6	7	6	7	6	7	7	7	7	7	6	6	4	4	6	4	3	3	3	3	5	5	5	4	4	5	3	1.7	80.2	999
1	13	8	6	7	6	7	6	6	7	3	6	6	3	3	4	3	2	4	3	4	3	4	5	5	5	4	4	4	3	1.6	64.7	29
1	14	8	3	2	5	4	7	4	5	7	7	7	6	4	1	6	3	4	4	4	4	4	5	5	5	5	5	5	2	1.82	65.6	27
1	13	8	4	3	2	6	5	3	4	5	6	6	1	6	1	3	3	3	2	3	2	3	2	5	3	3	4	3	1	1.71	104.8	42
1	13	8	4	4	4	4	2	5	1	2	3	2	5	3	1	1	2	2	999	3	4	3	5	5	5	4	4	5	1	1.7	54.7	66
2	15	8	5	6	6	6	2	6	7	6	6	5	6	4	3	5	3	3	1	1	1	2	2	2	2	1	1	1	3	1.57	57	27
2	14	8	4	6	4	6	1	4	2	1	6	4	5	4	1	2	3	3	2	3	2	3	4	5	5	4	5	4	1	1.53	46.7	36
2	14	8	6	7	7	7	7	6	7	7	7	7	6	6	6	6	7	4	3	4	4	4	4	4	4	4	4	4	1	1.66	50.6	48
2	14	8	6	7	6	7	6	6	7	7	7	6	6	5	4	6	6	3	2	2	2	4	2	3	2	4	2	4	1	1.61	51.8	48
2	14	8	3	3	4	3	3	3	7	3	4	1	5	3	3	4	1	4	4	4	4	4	4	2	4	4	3	3	3	1.63	55.5	48
2	14	8	4	6	5	7	5	5	7	6	7	5	6	6	4	4	4	3	2	3	2	3	4	3	4	4	3	3	1	1.62	47.9	42
1	15	8	5	6	3	3	6	6	6	5	999	3	6	6	2	3	3	4	4	3	4	4	5	4	4	4	4	4	2	1.74	61.9	33
1	14	8	6	5	5	2	3	4	6	5	3	5	5	3	2	2	3	4	2	4	3	3	5	5	5	1	2	1	1	1.7	66.3	48
1	13	8	3	7	6	7	6	7	2	5	7	6	3	4	1	4	3	3	2	2	3	3	2	4	3	3	3	4	1	1.74	45.5	53
1	13	8	6	5	2	6	6	3	7	2	5	5	2	5	1	2	1	4	3	4	4	4	5	5	5	5	5	5	3	1.7	53	48
1	14	8	4	3	2	1	2	3	5	4	1	4	2	3	1	1	2	3	1	1	4	2	3	5	3	4	4	4	1	1.61	48.3	34
1	14	8	5	5	5	4	5	6	6	6	5	5	6	6	2	4	2	4	3	4	4	4	5	5	1	5	5	5	3	1.78	58.8	52
1	15	8	5	6	5	6	4	4	6	6	6	5	4	6	3	5	3	3	2	3	2	3	3	3	3	3	4	5	2	1.74	63.9	27
1	15	8	2	6	5	7	6	3	5	7	6	6	2	6	2	5	6	4	3	4	3	4	5	4	4	4	5	5	2	1.76	59.8	17
1	14	8	4	4	5	5	4	5	6	4	6	3	5	5	3	3	6	3	2	3	3	4	3	4	4	3	3	4	1	1.83	58.5	42
1	13	8	5	3	2	3	5	5	7	3	3	3	6	5	1	3	6	3	3	2	3	3	4	4	4	4	4	4	3	1.72	85.6	33
1	13	8	5	7	4	5	3	4	7	7	6	4	3	6	1	1	1	4	4	4	4	4	5	5	5	5	5	5	1	1.52	42.3	41
1	14	8	5	5	4	5	4	5	6	5	4	5	5	5	4	3	3	4	3	3	3	3	3	4	3	4	3	3	2	1.64	70.7	42
1	14	8	6	6	6	6	6	5	6	5	6	6	6	5	6	5	5	3	3	3	3	3	4	5	4	4	4	4	1	1.71	55.7	52
1	14	8	2	4	2	5	4	2	7	2	5	5	2	3	2	2	2	4	1	4	2	4	5	5	5	5	5	5	2	1.76	72.3	27
2	16	9	6	6	7	7	5	6	7	6	6	5	4	4	3	5	3	3	2	3	3	3	4	5	4	4	4	4	2	1.64	105.6	27
2	15	9	6	5	5	6	5	5	7	6	7	7	6	5	3	5	3	2	2	2	2	3	3	4	2	2	2	2	3	1.55	65	33
2	16	9	6	7	6	7	7	6	5	5	7	6	5	3	2	5	3	3	1	2	2	3	4	2	2	2	2	2	3	1.57	61.5	27
2	14	9	2	5	1	5	2	5	7	2	2	4	3	4	1	2	2	3	3	2	3	3	3	3	2	2	3	2	2	1.53	53.1	42
2	15	9	7	2	7	7	6	4	6	6	7	4	7	6	2	2	4	4	2	4	4	4	5	5	5	5	5	5	2	1.53	86.7	43
2	17	9	3	4	4	5	2	4	6	3	6	4	5	4	2	6	2	2	2	2	2	3	1	1	1	1	1	1	3	1.63	60.9	49
2	14	9	1	2	4	3	1	1	6	3	2	1	2	2	1	1	1	3	3	2	3	3	4	4	1	4	4	4	2	1.63	66.6	48
2	15	9	2	4	2	6	1	2	7	3	7	999	2	1	1	3	1	3	3	4	2	3	5	5	5	5	5	5	1	1.56	51.5	32
1	16	9	6	6	5	6	6	6	6	5	5	6	6	6	3	7	7	3	3	3	2	4	2	2	2	2	2	2	2	1.77	67.7	38
1	14	9	1	4	1	2	1	2	2	1	1	1	6	7	1	6	6	3	3	3	4	5	5	3	4	3	3	4	3	1.69	46.9	28
1	15	9	2	5	5	5	4	3	6	6	3	6	4	5	3	3	5	3	3	3	3	4	3	3	3	4	4	2	1	1.76	72.2	26
1	15	9	1	6	1	6	1	2	7	1	2	2	1	2	1	2	2	3	2	3	3	4	5	5	5	2	3	3	2	1.78	70.4	35
1	14	9	3	7	3	7	4	4	7	6	1	6	1	1	1	2	4	4	4	4	4	4	4	5	4	5	4	4	1	1.52	42.3	41
1	14	9	1	1	1	2	1	2	6	1	1	1	1	2	1	1	1	4	3	4	4	4	3	1	3	4	2	5	2	1.71	49	49
1	15	9	3	2	1	2	1	3	5	1	3	1	5	1	1	1	1	4	4	4	4	4	5	5	5	5	5	5	2	1.67	46.1	48
1	15	9	2	1	4	1	7	4	7	4	6	4	1	1	1	4	3	4	3	4	4	3	5	3	5	5	5	5	1	1.64	53.4	45
1	15	9	2	2	2	3	2	1	5	2	4	2	1	2	1	1	2	3	2	3	2	3	1	1	1	1	1	2	1	1.62	62.5	33
1	15	9	3	5	2	4	1	3	6	4	5	2	2	3	1	2	1	3	2	4	4	3	4	4	2	2	4	4	3	1.81	69.8	45
1	14	9	1	4	2	4	2	1	4	2	2	1	2	2	1	1	1	4	4	4	4	4	3	5	5	5	5	5	2	1.69	85.6	71
1	15	9	3	1	2	2	5	5	4	2	5	2	6	6	1	2	4	3	3	2	3	2	4	5	5	4	3	3	3	1.71	96.1	43
2	11	6	5	6	5	6	7	6	6	6	7	7	6	5	2	4	3	3	3	3	3	3	4	3	3	2	3	2	1	1.46	46.9	28
2	12	6	5	5	6	5	6	6	7	6	4	6	6	6	2	4	3	3	3	3	2	4	3	4	4	3	3	2	1	1.46	33.2	41
2	11	6	6	6	6	7	6	6	5	7	7	7	4	6	6	6	5	3	3	3	4	4	4	3	3	4	4	4	3	1.52	44.4	34
2	11	6	6	6	3	999	5	5	7	999	7	6	3	5	2	5	4	3	2	3	3	4	4	4	4	2	5	4	3	1.47	49.8	34
2	11	6	5	6	7	7	7	6	5	7	7	7	5	5	3	5	3	3	3	3	2	4	4	4	4	2	4	5	1	1.74	55.3	41
2	999	6	6	6	5	7	6	7	7	7	7	7	5	6	1	5	7	3	2	1	3	4	4	4	5	3	3	4	1	1.58	45.8	53
2	11	6	5	7	7	7	7	7	7	5	7	6	5	7	6	6	6	3	3	4	3	4	5	5	5	4	5	5	1	1.52	41.6	49
2	12	6	6	4	3	4	6	6	5	6	5	6	4	4	1	5	4	3	3	4	2	3	4	4	4	3	3	5	1	1.55	39.6	41
2	11	6	5	6	4	7	6	6	7	7	7	7	4	4	1	4	5	4	2	3	3	4	3	5	5	4	4	5	2	1.39	37.2	36
2	999	6	7	7	7	6	7	7	7	7	7	7	7	7	7	5	5	4	3	4	3	3	5	5	5	5	5	5	1	1.46	45	48
2	12	6	4	6	7	6	6	6	7	6	7	4	3	5	4	7	3	3	3	4	3	4	5	5	5	5	5	5	1	1.45	37.4	26
2	11	6	2	7	4	7	7	7	7	7	7	7	7	3	1	7	1	2	4	4	4	4	1	2	5	3	4	5	3	1.52	43.4	42
2	11	6	2	6	3	6	5	6	7	5	7	7	5	5	1	3	5	3	2	3	3	4	4	4	4	2	4	4	1	1.49	32.1	63
2	11	6	7	7	6	6	7	6	7	6	7	6	6	6	4	6	4	4	3	3	3	4	4	3	3	3	3	3	1	1.59	72	47
1	11	6	5	4	4	6	6	6	6	7	6	6	5	6	1	1	5	3	3	4	3	3	3	5	4	4	4	4	1	1.61	71	41
1	11	6	1	7	7	1	7	7	7	7	7	6	1	1	1	1	1	4	2	4	2	4	5	5	5	5	5	2	1	1.53	49.1	48
1	11	6	5	6	4	4	4	5	6	3	5	3	4	4	3	4	2	2	2	3	2	3	3	3	3	3	2	3	1	1.59	66	41
1	11	6	3	6	3	6	5	5	6	2	7	4	4	4	1	3	3	3	2	4	3	3	4	3	4	4	4	4	1	1.47	50.4	60
1	14	6	1	5	1	7	7	7	7	7	5	7	1	2	1	4	1	4	4	4	4	4	5	5	5	4	5	4	1	1.72	56	33
1	12	6	6	5	6	3	6	4	4	5	7	5	999	5	2	4	2	3	3	4	3	3	2	5	5	4	4	4	1	1.55	49.1	41
1	11	6	6	6	7	7	7	7	7	5	7	2	2	2	1	2	4	4	4	3	4	4	5	5	5	5	5	5	1	1.58	48.8	48
1	11	6	2	6	6	7	7	6	7	4	6	7	1	6	1	1	4	4	4	4	4	4	5	5	4	5	5	5	2	1.46	39.2	29
1	12	6	5	6	3	7	6	6	7	5	6	6	6	6	1	2	6	3	3	3	3	4	5	4	5	5	4	4	1	1.42	45.1	41
2	13	6	1	1	1	1	1	1	4	1	1	7	7	1	1	1	7	4	1	1	1	4	1	4	1	1	1	1	2	1.58	47.8	52
2	11	6	4	4	4	4	4	5	5	6	#NULL!	6	4	6	4	5	4	3	3	3	3	3	3	4	3	3	4	3	2	1.45	36.8	27
1	12	6	1	7	4	7	7	1	7	7	7	7	1	1	1	4	1	1	4	2	4	3	5	5	5	5	5	5	2	1.66	62.7	36
1	13	6	6	7	5	6	6	6	7	5	7	6	7	4	1	3	4	4	3	3	3	3	5	5	5	5	5	5	3	1.59	65.7	17
1	11	6	1	7	2	4	5	4	6	1	999	3	5	4	1	1	1	4	2	4	4	4	5	5	5	4	5	5	1	1.55	46	33
1	11	6	7	7	7	7	2	999	1	7	7	7	999	3	2	4	7	4	4	3	4	4	5	5	5	5	5	5	2	1.53	42.9	33
1	12	6	5	6	4	4	4	6	6	7	5	5	4	5	2	4	2	3	3	4	3	3	4	5	4	4	4	4	1	1.56	58.6	29
1	11	6	3	5	2	3	4	5	7	6	5	5	6	4	3	1	2	3	2	3	2	3	4	3	3	4	4	4	1	1.39	35.5	49
1	12	6	4	3	1	3	7	5	6	4	4	4	6	4	3	1	3	4	3	4	4	4	5	5	5	4	4	3	2	1.57	45.9	33
1	11	6	1	7	7	7	7	1	7	7	7	7	7	7	1	1	3	4	4	4	4	4	5	5	5	5	5	5	1	1.51	39.6	45
1	11	6	6	6	4	5	7	2	7	5	6	5	3	4	4	1	3	2	2	2	4	3	3	5	4	3	3	4	3	1.51	46.9	41
1	11	6	5	4	5	6	7	7	6	6	7	7	7	7	2	2	2	4	4	4	4	3	5	5	5	5	5	5	1	1.47	35.9	70
2	12	7	4	6	4	7	5	5	7	7	7	6	4	4	1	4	1	4	3	4	4	4	5	5	5	5	5	5	3	1.55	63	51
2	13	7	5	5	4	2	5	4	6	3	6	5	5	3	2	2	2	3	1	3	2	3	5	4	2	2	3	2	1	1.64	52.6	30
2	12	7	6	4	5	7	5	5	7	5	7	7	6	4	2	5	1	3	2	3	2	4	3	2	3	2	4	4	3	1.55	42.5	33
2	12	7	5	5	6	7	7	5	7	6	6	6	6	6	3	5	4	3	4	3	4	3	5	4	4	3	5	4	1	1.55	56.7	59
1	12	7	6	7	6	7	7	7	7	6	7	6	7	6	3	4	6	3	3	3	4	3	5	3	4	3	4	3	1	1.54	63.9	71
1	13	7	6	5	3	4	5	6	6	6	7	6	4	5	2	1	1	3	3	4	3	4	5	4	4	4	4	4	2	1.62	57.9	65
1	12	7	6	7	6	7	6	7	7	6	7	5	6	5	6	5	4	3	4	3	3	3	5	5	5	5	5	5	1	1.46	41.3	52
1	12	7	7	6	7	7	7	6	7	4	5	4	7	6	3	4	6	4	3	3	4	4	4	5	5	4	5	3	1	1.54	42.4	28
1	13	7	7	6	7	7	7	7	7	3	7	3	7	5	2	2	4	4	4	4	4	4	5	5	5	5	5	5	1	1.65	59.1	48
1	12	7	6	7	5	5	7	7	7	6	7	6	6	6	2	4	3	3	4	4	3	4	5	4	5	3	4	4	1	1.55	51.1	59
2	13	7	7	7	5	7	7	5	7	4	7	4	6	6	1	2	2	4	3	4	3	4	4	5	4	3	5	5	1	1.63	51.3	49
2	12	7	5	5	4	6	7	5	4	5	6	5	6	3	3	6	4	4	3	4	2	4	5	5	5	5	5	5	1	1.63	63.2	57
2	12	7	6	7	7	7	7	6	7	6	7	5	7	7	4	4	4	4	4	4	4	4	4	3	4	4	5	4	1	1.51	36.9	42
1	12	7	4	7	3	7	3	5	4	4	5	3	7	3	1	1	1	4	3	4	4	3	4	5	4	5	5	5	3	1.4	28.3	38
1	12	7	6	4	4	5	4	6	3	4	6	5	2	5	3	5	4	3	2	3	3	3	2	4	4	4	4	4	1	1.55	44.8	49
1	12	7	4	3	2	3	4	5	6	2	4	6	999	5	1	2	2	3	3	3	3	2	3	3	3	3	3	4	2	1.49	30.5	89
1	14	7	7	7	7	7	7	7	7	7	7	7	7	7	3	5	5	3	2	3	3	4	5	3	4	3	4	5	1	1.56	38.1	47
1	12	7	1	6	2	5	4	4	7	7	7	5	6	3	1	1	1	2	1	3	3	3	3	3	4	3	2	2	1	1.53	47.1	40
1	12	7	5	7	6	5	7	2	1	1	7	2	1	4	7	3	6	3	4	4	3	4	5	5	5	5	5	5	2	1.54	41	26
1	13	7	6	7	7	6	7	5	6	5	7	6	3	2	2	2	3	4	3	3	4	3	5	5	5	5	5	4	1	1.6	40.9	43
1	12	7	6	7	5	5	6	4	7	5	7	7	3	4	3	4	3	4	3	4	3	2	5	5	4	5	5	5	1	1.57	62	86
1	12	7	4	7	4	7	6	5	4	6	6	5	5	3	1	3	2	3	2	3	4	3	3	3	4	2	2	2	3	1.6	60.7	27
1	13	7	3	6	2	6	4	4	6	3	6	3	3	3	1	4	2	4	4	4	4	4	5	5	1	5	5	5	1	1.62	42.2	53
2	14	8	3	5	5	5	3	5	2	3	5	3	3	3	2	3	2	4	4	3	3	4	4	5	5	2	4	4	1	1.63	67.1	40
2	13	8	6	7	7	7	4	5	7	7	7	7	7	7	4	4	5	3	2	3	3	3	5	5	3	5	5	4	1	1.55	43.4	48
2	14	8	5	6	3	5	4	6	7	5	6	5	4	4	2	5	2	3	2	3	2	2	3	2	3	2	2	2	1	1.72	56.1	53
2	14	8	5	6	7	7	6	6	6	6	6	6	4	6	5	6	5	3	3	3	3	3	4	3	4	3	4	4	3	1.6	68.9	42
2	14	8	4	6	4	5	5	4	5	5	4	5	3	4	2	4	4	4	4	4	4	4	5	5	3	5	5	4	1	1.67	55.7	36
2	14	8	6	5	5	5	5	6	5	4	5	6	6	5	2	5	4	3	2	3	3	3	1	4	1	3	1	4	2	1.63	62.7	45
2	14	8	6	5	4	4	6	7	5	6	5	6	5	4	3	3	3	3	2	3	3	3	3	3	2	2	2	2	1	1.58	49.4	36
2	14	8	4	2	2	3	5	5	7	2	6	5	1	4	1	2	1	3	1	2	3	3	3	3	3	4	3	2	1	1.58	64	25
2	13	8	7	5	3	3	3	6	6	6	5	3	4	3	3	2	5	3	1	2	2	3	2	2	2	2	1	1	1	1.73	59.9	41
2	14	8	6	5	4	5	6	6	5	3	6	5	4	4	1	5	1	3	3	3	2	3	3	3	3	3	2	3	3	1.56	55.4	24
1	13	8	6	7	7	7	7	6	7	7	7	7	6	6	1	7	7	4	4	3	4	4	5	5	5	5	5	5	1	1.58	43.5	60
1	14	8	6	6	7	5	5	6	7	6	7	5	6	6	6	6	6	3	3	3	3	4	4	4	3	4	4	3	1	1.6	43.4	38
1	14	8	5	7	7	7	7	7	7	7	7	7	6	5	1	4	1	3	3	4	2	4	5	4	2	2	2	2	1	1.76	60.9	26
1	14	8	6	6	4	6	5	6	2	7	7	2	7	6	6	2	2	3	1	4	3	3	5	5	5	5	5	5	1	1.75	87.5	33
1	15	8	5	6	5	6	2	6	7	3	3	2	7	5	1	3	1	3	3	4	4	4	5	5	5	5	5	5	3	1.66	52	49
1	14	8	5	6	6	7	7	5	7	3	7	6	7	6	1	6	3	4	3	4	4	4	5	5	5	4	5	5	1	1.65	45.6	43
1	14	8	6	7	6	6	5	6	7	6	6	6	7	6	2	5	6	3	3	4	3	3	5	5	5	1	5	5	1	1.78	80	48
1	14	8	7	7	6	7	4	5	7	6	6	4	7	6	5	3	3	4	4	4	4	4	5	5	5	5	5	5	1	1.73	56.7	56
1	15	8	4	7	6	7	6	4	7	5	7	5	6	7	2	7	3	3	2	4	3	4	5	3	5	5	5	5	1	1.8	56.2	36
2	15	9	6	6	6	6	6	6	7	7	7	7	6	5	4	5	4	4	3	4	2	3	5	5	5	5	5	5	1	1.68	56.4	52
2	15	9	6	5	6	7	4	6	7	4	7	6	4	3	2	4	2	3	1	2	2	1	3	4	3	4	3	3	1	1.65	51	52
2	14	9	4	4	4	7	4	5	6	6	6	6	3	4	1	4	3	2	1	1	1	2	3	1	2	2	1	2	3	1.67	55.9	33
2	15	9	5	7	4	7	5	6	7	6	7	6	4	5	2	5	3	4	3	4	4	4	1	3	3	2	3	2	2	1.58	61.3	41
2	14	9	5	5	6	6	4	5	7	4	6	4	4	4	4	5	4	3	2	3	2	3	3	4	4	3	2	3	1	1.7	67.6	41
1	15	9	7	7	4	7	4	7	5	2	7	4	4	5	5	5	7	1	1	3	1	3	2	3	2	1	1	2	2	1.8	121	41
1	14	9	5	4	2	4	1	3	7	2	3	1	1	1	1	3	2	1	1	2	1	2	2	2	1	2	2	2	1	1.7	53.6	66
1	15	9	3	4	3	5	4	4	2	3	6	5	5	4	2	3	3	3	3	3	4	4	4	3	3	3	3	2	3	1.82	91.4	33
1	16	9	5	6	2	4	6	4	7	5	7	2	6	4	1	1	2	4	3	4	3	4	4	3	3	4	4	4	1	1.74	68.2	51
1	16	9	7	6	3	6	5	7	7	7	7	5	5	4	7	4	6	4	4	4	4	4	5	5	5	5	5	5	3	1.93	90.5	45
2	11	6	4	7	6	7	5	7	7	6	6	6	1	3	2	4	4	2	2	2	3	3	5	5	3	3	3	3	3	1.47	35.4	33
2	999	6	5	4	5	6	6	5	6	4	5	5	5	4	3	5	4	4	3	4	3	3	3	4	4	4	4	4	2	1.52	46.3	38
2	12	6	6	5	4	5	7	6	6	6	6	7	5	5	3	4	4	3	2	3	3	3	1	3	2	2	2	3	2	1.54	45.2	41
2	11	6	6	4	3	4	2	4	6	3	5	6	5	2	4	3	2	2	1	2	3	3	2	3	2	2	2	1	2	1.54	44.5	60
2	12	6	4	5	5	5	4	6	7	7	6	7	6	5	3	5	4	3	3	3	4	4	4	4	3	3	4	4	2	1.71	85	43
2	12	6	6	6	6	7	6	5	7	7	6	6	6	6	4	6	4	4	3	4	4	3	4	4	5	3	4	3	2	1.68	86.8	17
2	12	6	6	6	5	5	6	6	6	7	5	6	5	6	3	3	4	3	3	3	3	2	4	4	4	3	4	4	3	1.55	38.9	36
2	12	6	4	4	1	6	7	5	1	7	5	7	4	4	1	3	7	4	2	1	999	3	4	5	3	5	5	4	2	1.52	47.7	999
2	11	6	6	7	4	4	6	6	7	7	4	7	3	4	1	4	4	4	1	3	2	4	5	5	5	5	5	5	1	1.71	999	41
2	12	6	4	6	4	4	4	5	7	5	4	6	3	4	1	3	1	3	1	1	2	3	3	2	3	2	2	3	3	1.61	50.9	999
2	12	6	6	7	6	7	7	6	6	6	7	7	7	6	4	4	4	4	3	4	4	3	3	3	3	3	3	4	3	1.56	49	27
1	12	6	4	7	6	7	7	7	7	5	7	4	7	7	4	3	7	4	4	3	4	4	5	5	5	5	5	5	3	1.67	62.4	29
1	13	6	7	7	7	7	7	7	7	7	1	7	1	1	1	1	1	4	4	4	4	4	5	5	5	5	5	5	2	1.48	52	32
1	13	6	7	7	7	7	7	7	7	7	7	7	7	7	7	7	7	4	4	4	4	4	4	5	5	5	5	5	2	1.66	59.2	999
1	13	6	7	7	7	7	7	7	7	7	7	7	6	7	4	6	6	4	4	4	2	4	5	4	5	5	5	5	3	1.53	60.6	43
1	999	6	7	7	5	6	5	7	7	7	7	6	4	4	4	6	5	4	3	4	3	3	5	5	5	4	5	4	3	1.68	54.6	65
1	11	6	7	7	6	7	7	7	7	6	7	6	6	6	3	6	5	4	3	4	4	4	5	5	5	5	5	4	2	1.44	46.9	33
1	12	6	3	7	7	7	7	7	7	1	7	7	7	1	1	7	7	4	4	4	4	4	5	5	5	5	5	5	2	1.45	38.1	41
1	13	6	6	7	6	6	7	7	7	7	7	7	6	6	5	5	6	3	3	4	3	3	4	4	4	4	4	4	2	1.61	67.4	36
1	12	6	5	6	3	4	5	6	7	7	6	7	1	5	1	2	4	2	3	2	3	4	5	5	2	5	4	5	3	1.57	65.1	42
1	12	6	2	7	7	7	7	7	7	7	7	7	7	7	2	7	2	4	4	4	4	4	5	5	5	5	5	5	3	1.55	45.5	34
1	13	6	7	7	7	7	6	6	6	7	6	5	7	6	6	6	2	3	4	4	3	3	3	2	2	3	3	3	2	1.5	57	36
1	11	6	7	6	7	7	7	7	7	6	7	5	5	6	2	4	3	4	3	3	4	3	4	5	4	4	5	5	3	1.56	44.8	57
1	12	6	3	6	3	7	7	6	7	7	7	7	3	4	1	3	1	3	3	1	2	1	3	2	3	4	2	3	3	1.64	77.1	48
2	13	7	5	6	7	6	6	6	7	5	7	7	6	7	4	5	3	3	3	3	3	4	5	5	4	4	4	4	2	1.66	56	18
2	13	7	4	3	6	4	5	5	5	5	5	5	3	4	3	3	3	3	3	2	3	3	3	3	1	2	4	3	2	1.54	45	41
2	13	7	7	7	4	4	7	4	7	7	7	7	4	7	3	4	3	4	4	1	4	1	5	5	5	5	5	5	3	1.51	42.3	38
2	12	7	3	5	4	4	7	4	7	7	7	7	6	7	1	7	3	4	4	4	3	4	5	4	1	5	5	5	3	1.63	46	48
2	13	7	3	3	3	4	2	5	6	5	6	6	6	5	2	5	6	3	2	3	2	3	4	4	4	2	4	4	2	1.59	46	48
2	13	7	5	5	2	5	6	6	7	3	7	3	6	3	3	5	2	3	4	3	3	3	4	4	4	4	4	4	3	1.59	44.5	41
2	12	7	1	3	3	3	7	2	2	1	7	1	6	5	1	1	5	2	2	3	3	2	4	4	4	2	3	3	3	1.57	46.6	38
1	14	7	2	1	3	3	4	4	7	3	4	5	3	4	3	4	2	4	4	4	4	1	3	4	2	3	2	3	3	1.72	58.5	27
1	12	7	5	1	4	5	2	2	2	1	6	1	3	2	1	2	3	3	1	4	3	3	4	4	3	3	4	2	3	1.53	59.8	999
1	14	7	1	7	2	6	5	4	7	3	7	7	6	6	5	2	1	4	3	4	4	4	5	5	5	5	5	5	2	1.61	88.6	33
1	13	7	3	2	3	5	7	4	7	1	7	5	3	5	1	5	6	4	3	3	3	4	1	3	2	4	2	1	3	1.81	79.6	33
1	13	7	2	5	3	7	6	7	2	1	7	4	4	1	1	2	1	3	2	4	2	1	4	5	4	3	4	3	3	1.71	62	33
1	12	7	1	7	1	4	1	4	7	2	5	6	3	4	1	1	1	4	4	4	3	2	5	5	4	5	5	5	1	1.57	43.5	63
1	13	7	6	7	6	7	7	7	7	7	7	7	7	6	6	7	5	4	4	4	4	4	5	5	5	5	5	5	3	1.68	54.6	999
1	13	7	5	6	5	7	4	5	7	6	6	5	6	4	5	3	2	3	2	3	3	2	5	4	4	4	4	4	2	1.67	62.1	34
1	13	7	7	6	3	7	7	7	7	6	7	7	6	6	7	3	3	4	4	3	4	4	5	5	5	4	5	5	2	1.49	42.1	37
1	12	7	4	7	6	6	4	5	7	7	6	5	4	7	1	3	2	3	3	4	4	4	5	5	4	4	5	4	3	1.58	42	33
1	13	7	4	7	4	7	6	4	1	7	7	6	4	2	1	6	2	3	4	3	3	2	4	4	3	3	3	3	2	1.72	65.8	32
1	13	7	7	7	4	6	4	6	7	6	7	6	5	5	1	2	1	1	1	1	2	3	3	3	3	3	2	3	2	1.82	109.1	38
1	15	7	1	6	1	2	3	3	3	3	5	6	2	1	2	3	1	3	3	4	3	3	5	5	4	4	5	4	3	1.67	71.5	38
1	12	7	1	7	5	7	4	5	7	4	7	5	6	6	7	1	5	4	4	4	4	4	5	5	5	5	5	5	1	1.5	43.3	999
2	13	8	5	4	2	3	4	3	6	5	5	5	4	3	3	5	1	3	2	2	3	3	2	1	2	1	2	2	2	1.59	43.6	48
2	13	8	6	5	5	5	6	6	5	4	5	5	6	6	4	4	3	3	3	3	2	3	2	3	3	3	3	2	2	1.59	49.8	41
2	13	8	3	4	5	5	2	5	5	3	6	3	2	2	999	3	999	2	3	1	3	3	5	5	4	2	2	4	1	1.62	44	51
2	15	8	5	6	3	5	5	999	7	5	7	3	7	6	5	3	2	4	2	3	2	4	3	4	3	2	2	4	1	1.61	61.6	57
2	13	8	3	3	2	7	4	4	7	2	6	5	6	2	1	1	1	3	2	3	2	3	3	4	2	4	4	3	1	1.66	52.2	48
2	13	8	5	5	6	6	6	6	7	6	6	6	6	5	4	6	6	3	3	3	3	3	3	2	2	2	3	2	2	1.56	39.2	33
2	13	8	5	4	4	7	6	3	7	3	6	3	6	5	3	4	2	3	3	4	2	3	3	3	2	2	3	3	2	1.56	53.4	41
2	13	8	6	5	4	6	7	4	7	7	6	7	5	6	2	5	3	3	3	4	3	4	4	3	3	2	4	3	3	1.55	51.3	41
2	15	8	6	7	7	7	5	6	999	7	7	7	6	6	6	5	5	4	3	3	4	4	5	5	5	3	5	1	3	1.61	58	48
2	13	8	6	3	3	2	4	4	6	3	6	5	6	4	5	1	2	3	3	4	3	3	2	3	2	4	3	4	3	1.63	67.1	41
2	15	8	6	5	4	6	3	4	7	3	6	5	6	2	2	4	2	3	3	2	3	3	4	4	4	4	3	2	2	1.66	61.8	33
2	13	8	6	3	4	5	5	4	6	4	5	5	6	4	3	3	1	3	3	3	3	3	2	3	3	1	2	2	3	1.53	49.3	41
1	13	8	7	5	5	5	5	6	6	7	4	7	6	5	3	4	6	3	3	3	3	3	4	5	4	4	5	4	1	1.7	46.8	67
1	13	8	5	3	2	4	4	3	6	5	3	6	5	5	1	5	2	4	3	3	4	3	4	5	4	5	4	4	2	1.55	74.6	17
1	13	8	1	2	1	6	6	3	6	2	6	6	3	4	1	1	2	3	4	3	3	3	5	5	5	5	5	4	2	1.74	70	36
1	14	8	1	3	1	2	1	1	7	6	6	2	2	2	1	1	1	4	4	4	4	4	1	5	5	5	5	5	2	1.75	55.7	33
1	13	8	3	6	2	6	4	5	7	4	6	4	2	1	2	2	1	4	3	3	4	4	4	5	5	4	4	4	2	1.61	61.3	41
2	14	8	6	6	4	5	4	4	6	5	5	5	4	4	3	3	3	3	3	3	3	3	2	2	2	2	3	3	2	1.63	75.7	45
2	14	8	6	4	4	7	6	4	6	2	7	6	6	6	1	4	4	3	4	3	4	3	5	4	5	4	4	4	2	1.69	54.6	41
2	13	7	6	6	6	6	6	6	6	6	5	6	6	6	2	6	5	4	4	4	4	4	2	2	2	2	2	3	3	1.56	50	36
2	13	8	6	7	5	6	6	5	7	7	7	6	6	6	4	6	5	3	2	3	4	4	4	2	3	3	3	3	3	1.56	50.5	26
2	15	8	7	7	7	7	7	7	7	7	7	4	4	6	3	4	5	4	4	4	3	4	3	2	2	3	3	2	2	1.64	63.6	34
2	14	8	7	4	1	6	7	5	7	1	6	7	7	1	1	6	5	4	3	4	4	4	4	3	2	4	5	5	2	1.59	63.2	38
2	14	8	7	7	6	6	5	7	7	5	5	2	4	5	1	6	1	3	1	3	1	1	4	2	1	1	1	4	3	1.79	138.8	29
2	14	8	6	7	7	7	6	7	6	6	7	7	7	6	4	6	6	4	3	4	4	3	3	3	3	2	2	3	2	1.7	65	32
2	13	8	4	7	7	7	4	4	7	5	7	7	6	3	2	5	1	4	3	1	4	4	1	2	2	1	1	1	3	1.59	61.6	37
2	13	8	4	6	6	6	4	3	7	7	7	7	5	5	4	5	5	3	3	3	3	4	3	5	3	2	2	3	3	1.67	68.9	33
2	14	8	2	6	4	6	3	2	2	2	6	3	6	6	2	2	4	3	3	2	3	2	4	4	5	5	5	5	2	1.69	61.8	34
2	15	8	3	4	3	6	4	4	6	3	4	5	4	4	4	4	5	1	2	2	3	3	2	2	3	3	3	3	2	1.66	98.6	42
1	14	8	5	5	2	4	1	3	6	3	5	5	4	1	1	3	2	4	3	3	3	4	1	4	5	3	2	3	3	1.77	94.4	57
1	14	8	2	1	2	2	6	3	6	5	2	3	3	3	1	2	5	3	2	2	3	2	4	4	4	4	4	4	3	1.79	61.9	39
1	14	8	2	3	3	5	1	3	5	3	7	2	6	5	5	2	2	4	4	2	4	3	2	5	1	2	2	2	3	1.41	30.5	33
1	15	8	2	6	2	5	4	3	7	3	6	2	5	4	3	4	2	3	4	4	3	4	3	5	4	4	4	3	2	1.61	51.8	35
1	14	8	6	1	1	2	2	2	7	1	3	5	5	2	6	1	2	4	3	4	3	4	4	4	2	4	4	4	2	1.57	54.1	34
1	16	8	7	6	999	5	5	999	7	5	7	5	4	999	2	1	4	3	4	3	3	3	5	4	5	3	2	999	2	1.74	113.7	31
1	15	8	5	2	1	1	1	5	4	3	2	2	3	3	1	2	2	4	3	4	4	3	4	4	4	999	3	3	2	1.73	57.6	33
1	15	8	2	7	1	1	1	1	7	7	6	1	2	3	1	2	1	4	3	4	3	4	2	5	1	1	1	1	1	1.74	72.3	52
2	15	9	3	6	3	6	7	4	7	5	7	6	6	4	1	4	5	3	4	4	1	4	3	5	5	5	5	5	1	1.51	48.4	34
2	14	9	3	5	2	5	5	3	7	6	5	3	5	3	2	4	2	4	4	4	4	4	5	5	5	5	5	5	1	1.81	71.8	45
2	15	9	6	4	5	3	6	6	7	7	6	6	3	3	2	6	4	3	1	2	3	3	2	3	3	3	999	4	3	1.53	49.1	18
2	15	9	6	6	4	7	7	7	7	6	7	7	6	6	1	4	1	4	4	4	3	3	5	5	5	5	5	5	3	1.5	50.8	41
2	14	9	6	7	6	7	7	6	7	5	7	5	3	3	2	6	7	3	1	2	3	3	2	4	2	2	2	2	3	1.62	74.1	32
2	15	9	2	4	2	4	5	4	7	6	7	3	1	3	1	2	1	4	2	3	999	4	5	4	4	4	5	4	1	1.55	47.2	50
2	15	9	6	7	5	6	7	6	6	7	7	6	7	6	1	3	7	3	1	3	3	2	5	5	2	5	5	5	3	1.52	45.7	42
1	15	9	7	7	6	7	7	7	7	6	7	6	7	6	5	6	6	4	3	4	4	4	5	5	5	5	5	5	2	1.67	58.5	27
1	15	9	6	5	3	4	4	5	7	6	5	6	6	3	2	1	5	3	4	3	3	4	1	2	1	1	1	2	2	1.76	48.9	41
1	16	9	7	7	6	7	7	7	7	7	7	7	7	7	5	7	7	4	3	4	4	4	4	5	4	2	3	3	1	1.67	53.7	18
1	15	9	5	7	5	7	3	6	7	5	7	7	6	3	2	5	5	3	2	4	3	3	2	4	4	2	4	4	3	1.68	97.7	41
1	16	9	5	7	6	6	7	7	6	7	6	5	5	6	5	5	5	4	3	4	3	4	5	4	3	4	4	5	2	1.77	59.9	33
1	15	9	5	5	5	5	7	5	6	1	6	2	7	6	1	3	5	2	1	2	3	3	2	2	2	1	1	1	1	1.78	76.2	28
1	16	9	3	4	3	4	4	5	7	5	5	6	3	4	1	3	1	3	3	3	3	3	2	4	2	2	2	4	2	1.78	81.6	34
1	15	9	5	5	4	1	6	5	7	3	5	6	6	6	2	3	7	3	2	3	3	4	3	5	5	5	5	4	1	1.73	52.3	28
1	16	9	5	3	4	5	5	5	6	5	6	5	4	3	5	4	4	4	3	4	4	3	3	4	2	3	3	2	2	1.84	91.3	48
2	17	9	6	5	6	6	4	6	6	6	7	6	6	6	4	6	6	4	3	4	3	3	3	3	3	3	3	3	2	1.58	57.5	27
2	16	9	6	6	4	999	4	6	7	5	6	4	999	5	4	3	5	3	2	3	3	3	4	3	3	2	3	3	2	1.54	44.6	34
2	15	9	6	2	5	3	3	6	3	2	5	2	3	5	1	3	1	4	3	4	3	3	2	2	2	1	2	2	2	1.61	79	23
2	14	9	5	6	6	6	7	7	7	7	7	7	6	6	5	6	6	2	3	3	3	3	2	2	2	2	2	2	2	1.61	68.5	38
2	16	9	4	6	5	7	5	5	6	5	6	5	5	4	2	6	4	2	2	3	3	3	3	3	3	2	2	3	2	1.68	64.8	38
2	15	9	2	6	3	7	6	3	6	4	7	6	4	6	1	1	1	3	3	2	4	3	3	1	2	1	3	2	2	1.59	64.4	38
2	15	9	6	7	7	7	7	7	7	6	7	7	6	7	6	4	5	3	2	4	3	4	4	5	4	3	4	5	2	1.72	62.6	33
2	15	9	6	6	5	5	3	5	7	4	6	5	7	4	3	3	5	3	3	4	2	2	3	3	3	3	4	4	2	1.64	57.1	34
2	15	9	6	5	3	7	7	5	7	2	7	2	7	7	2	7	7	1	1	3	2	4	2	3	2	3	5	4	2	1.62	78.4	58
2	14	9	3	4	4	6	6	5	7	5	7	6	5	4	3	4	7	3	3	2	3	3	2	3	2	1	2	2	2	1.67	83.6	32
1	15	9	3	2	4	6	2	4	7	3	5	6	5	2	1	2	1	4	3	4	4	3	4	4	3	4	4	3	1	1.71	71.2	38
1	15	9	3	7	3	7	5	5	6	4	7	4	5	5	3	1	1	3	3	4	4	4	6	6	6	5	5	5	1	1.6	70.1	41
1	15	9	3	3	5	4	5	7	7	3	7	5	5	6	3	3	6	3	2	2	3	4	2	4	5	4	3	4	3	1.65	56.7	57
1	16	9	6	6	5	6	6	6	7	6	7	5	6	5	3	2	2	4	4	4	4	4	5	5	5	4	4	4	999	1.78	68.9	33
1	15	9	3	3	2	3	7	5	7	5	7	5	5	6	1	2	4	3	3	3	4	3	5	5	4	4	4	4	2	1.73	64.9	32
1	15	9	6	7	7	999	5	5	7	6	6	6	6	5	2	2	2	4	4	4	3	3	5	5	5	5	5	5	2	1.82	68.4	18
1	15	9	4	5	4	4	1	3	4	7	7	7	1	1	4	6	5	1	4	3	1	2	1	3	3	1	1	1	1	1.72	67.7	38
1	15	9	6	7	6	7	6	7	7	5	7	6	6	5	5	6	7	3	3	4	4	3	4	3	4	3	3	3	3	1.81	66.6	34
2	15	10	1	3	3	4	2	2	4	2	2	2	2	2	1	2	2	3	3	3	3	2	1	2	2	2	2	2	2	1.59	999	999
2	15	10	6	6	6	7	6	4	7	7	6	5	6	6	3	2	5	3	3	4	3	4	2	4	4	4	3	3	3	1.72	61.5	45
2	16	10	6	6	3	4	4	4	6	5	4	5	4	4	3	2	4	3	3	4	3	4	3	4	4	4	4	4	2	1.62	54.9	57
2	16	10	6	6	4	6	6	6	7	6	7	6	4	4	2	2	1	3	2	3	3	3	3	4	4	3	3	3	3	1.59	40.4	55
2	15	10	6	5	3	5	5	4	6	5	6	5	5	4	2	3	4	3	1	3	3	3	3	3	3	2	2	2	1	1.68	999	52
2	16	10	3	5	3	6	4	4	5	2	5	6	5	3	3	4	5	3	3	3	2	3	1	5	2	4	4	4	1	1.62	999	26
2	16	10	1	1	1	2	1	2	6	3	3	1	2	3	2	2	1	3	2	2	4	2	1	4	2	2	2	2	3	1.83	999	999
1	17	10	7	6	6	7	7	7	7	4	7	6	6	5	4	5	7	4	4	3	4	4	4	5	5	5	5	5	2	1.85	88.7	41
1	16	10	6	6	6	6	6	6	6	6	7	7	6	6	4	6	5	4	4	4	3	999	5	5	3	5	5	4	2	1.72	53.3	27
1	17	10	6	7	6	6	7	6	6	6	6	6	5	6	1	3	3	4	4	4	4	4	5	4	4	5	4	5	3	1.8	89.2	999
1	15	10	7	6	6	6	6	7	6	6	6	6	7	6	1	7	6	4	4	4	4	4	5	4	4	4	4	4	3	1.82	82.2	33
1	16	10	7	7	6	6	4	6	5	5	7	5	6	3	3	7	2	4	4	3	3	4	4	5	5	4	4	5	3	1.79	73.6	51
1	16	10	6	5	3	5	6	6	6	5	6	5	6	6	2	2	1	4	4	4	4	4	4	5	2	999	4	4	3	1.71	54.2	32
1	16	10	6	7	5	7	5	5	7	7	7	7	6	5	3	4	4	2	2	3	1	2	3	2	3	2	1	1	2	1.68	78.3	36
1	16	10	7	7	6	7	4	7	7	6	7	6	7	4	4	6	4	3	1	2	1	2	2	4	2	3	3	3	3	1.73	54.6	69
2	16	10	6	7	5	7	7	6	7	6	7	5	7	5	6	6	6	4	3	3	2	4	4	4	3	2	3	3	3	1.52	56.3	17
2	17	10	4	7	4	7	5	7	7	7	7	7	5	6	7	7	5	3	2	1	2	2	1	1	3	1	2	2	3	1.59	47.4	999
2	15	10	7	7	6	7	4	6	7	6	7	7	7	6	3	3	2	3	2	2	2	3	4	4	4	4	4	4	2	1.62	62	33
2	16	10	4	7	5	7	7	6	7	4	7	3	5	4	3	4	4	4	3	4	2	3	5	5	5	4	5	4	1	1.55	46.9	26
2	15	10	5	5	3	6	3	6	7	6	7	6	6	3	3	5	3	3	2	3	3	3	1	1	2	2	2	2	1	1.59	50.1	59
2	16	10	3	7	2	2	6	5	6	7	6	6	3	3	1	6	1	4	3	4	3	3	4	4	4	4	4	4	2	1.7	54	10
2	16	10	3	6	5	7	5	5	7	3	7	6	6	5	3	3	1	4	3	4	3	4	4	4	4	4	4	5	1	1.74	90.8	57
1	17	10	6	6	6	6	3	5	4	4	7	4	2	4	2	5	6	4	3	4	3	3	2	2	2	2	2	3	3	1.71	90.2	28
1	16	10	6	7	4	5	5	6	6	5	5	5	6	6	2	5	4	3	2	3	3	3	4	3	4	2	2	2	1	1.67	46.2	51
1	15	10	7	4	7	6	6	6	7	7	6	7	7	7	4	4	5	4	3	4	4	4	5	3	5	1	1	2	1	1.76	76	70
1	17	10	6	6	6	7	6	7	7	7	7	7	7	5	5	6	7	4	4	4	4	4	4	5	5	4	4	4	3	1.7	80	999
1	16	10	7	6	6	6	7	7	7	7	7	7	6	6	5	5	5	3	2	2	4	4	4	5	2	2	2	2	3	1.77	127	27
1	18	10	5	7	5	6	5	7	6	4	6	5	5	5	1	4	4	3	4	4	3	2	4	3	4	5	4	4	2	1.76	138	49
1	17	10	6	5	6	6	7	7	5	7	7	6	7	5	3	6	7	3	4	4	3	3	5	5	5	5	5	5	2	1.74	60.8	41
1	15	10	7	6	7	7	7	7	7	6	7	5	7	7	4	6	5	4	4	4	3	4	5	5	5	5	5	5	2	1.78	77.8	36
2	11	6	5	4	5	7	6	5	6	3	6	3	5	5	1	4	4	4	4	4	3	3	4	4	5	4	4	4	1	999	999	41
2	11	6	3	4	2	2	1	4	6	6	5	5	3	3	1	1	4	3	4	4	3	3	3	4	5	4	3	4	1	999	999	33
2	11	6	5	7	5	7	7	6	4	3	7	4	7	7	2	4	4	3	2	2	3	3	3	3	3	4	3	4	1	1.45	41.7	41
2	11	6	5	5	5	6	3	5	6	4	7	4	3	3	3	3	3	3	2	1	4	3	5	4	4	2	1	1	999	1.57	63.2	41
2	13	6	5	7	6	4	7	6	7	6	7	7	7	6	2	3	5	3	3	3	4	4	4	3	2	2	3	3	1	1.58	65.9	37
2	11	6	4	6	3	6	7	6	6	5	7	4	4	4	3	4	6	4	3	4	3	4	4	4	3	4	5	5	1	1.53	35.8	32
2	12	6	4	6	4	5	6	6	7	4	6	5	7	5	4	4	4	3	2	3	3	3	5	5	5	4	3	3	2	1.58	75.1	33
1	13	6	4	4	4	4	4	4	6	3	4	3	3	3	1	3	6	3	3	3	2	3	5	3	3	5	4	5	1	1.6	50.3	38
1	11	6	5	7	6	7	7	6	7	5	7	7	2	4	2	4	7	4	3	4	3	4	5	4	4	4	5	5	1	1.4	32.5	70
1	12	6	5	6	4	7	5	6	4	2	7	4	7	3	1	4	2	3	3	2	3	4	5	3	5	3	3	2	1	1.48	37.1	42
1	13	6	5	7	5	4	4	6	7	7	5	3	5	999	4	5	5	3	3	2	3	3	4	4	3	2	2	3	2	1.5	48.1	41
1	14	6	4	5	6	7	7	6	7	6	7	6	6	6	3	4	4	4	3	3	3	4	5	5	5	5	5	5	1	1.76	60.1	26
1	12	6	4	4	4	5	4	6	7	6	6	6	3	3	999	3	3	4	3	3	4	4	5	5	5	5	5	4	2	1.68	83.6	31
1	12	6	4	5	4	4	4	5	7	5	7	4	4	4	1	4	5	4	4	3	4	3	5	3	2	2	2	3	1	1.48	35	42
1	11	6	6	7	5	7	7	6	7	7	7	7	4	6	4	4	4	4	3	4	4	4	5	4	2	5	5	5	1	1.66	62.8	66
1	12	6	4	6	4	5	5	5	7	4	5	4	5	4	3	3	5	3	3	3	3	3	2	4	4	4	3	4	2	1.51	37.3	23
1	14	6	4	5	4	4	7	6	7	4	5	3	4	4	1	1	1	4	4	4	4	4	5	5	5	5	5	5	1	1.75	54.7	26
1	12	6	1	4	1	4	4	2	7	5	6	3	4	2	1	7	6	3	4	2	4	3	3	2	2	2	2	2	1	1.39	31.5	33
1	12	6	4	3	3	5	6	4	7	3	6	6	4	2	2	4	3	3	2	3	3	3	5	3	2	3	3	3	1	1.39	41.6	54
2	12	7	6	4	4	3	7	1	7	7	2	6	1	1	1	1	4	3	3	2	3	4	4	4	4	4	4	4	1	1.69	55	68
2	12	7	7	6	6	6	7	6	3	7	7	7	4	4	5	5	6	4	3	3	4	2	5	4	5	4	4	5	1	1.57	47.5	41
2	13	7	5	4	3	5	4	5	6	4	3	5	5	4	2	4	5	2	3	2	3	3	3	2	3	2	3	3	1	1.79	52	42
2	12	7	4	7	5	7	6	5	7	6	7	6	4	5	2	6	4	3	3	3	4	3	5	5	5	5	5	5	1	1.65	48.7	57
1	12	7	7	6	6	6	4	7	7	7	7	5	7	6	5	4	1	3	3	3	3	3	5	4	4	4	4	4	1	1.61	73	26
1	13	7	4	6	6	4	5	7	7	6	6	6	4	5	4	3	6	4	4	4	4	4	5	5	4	5	4	1	1	1.71	64.2	53
1	12	7	6	7	7	7	7	7	7	6	7	6	6	6	4	6	5	4	3	3	3	4	5	5	5	5	4	5	1	1.51	31.1	27
1	13	7	7	7	6	7	6	6	7	7	6	7	7	6	5	6	6	4	3	4	4	4	5	4	4	4	5	5	2	1.76	61.6	48
2	12	7	4	5	5	5	4	6	6	6	6	7	6	999	2	4	4	4	3	4	4	3	4	3	4	5	5	4	2	1.31	22.5	999
2	12	7	6	6	6	6	7	6	6	7	7	7	6	6	3	3	3	3	2	3	2	3	3	2	2	2	3	3	1	1.5	33.8	26
2	12	7	6	7	6	7	5	7	7	6	6	6	7	5	5	5	3	4	4	999	3	3	5	5	4	4	4	4	1	1.5	39.5	24
2	12	7	6	7	7	7	6	7	7	7	6	7	7	6	4	4	4	4	4	4	3	4	5	5	5	4	4	5	1	1.62	49.1	33
1	13	7	4	999	6	999	6	7	6	999	6	6	6	7	4	4	4	4	3	3	4	3	4	4	4	3	3	3	1	1.48	32.7	48
1	12	7	5	6	3	5	5	6	7	4	6	6	6	3	2	2	6	4	2	4	3	3	5	5	5	5	4	4	1	1.65	69.1	38
1	13	7	6	6	6	6	7	7	7	7	6	7	6	6	4	4	5	3	2	3	2	3	4	2	2	2	2	3	1	1.49	40.5	64
1	12	7	6	999	5	5	4	6	7	4	6	4	5	4	3	999	3	3	3	3	2	3	5	4	3	5	4	4	1	1.66	51.2	69
1	12	7	7	5	6	5	7	7	7	4	7	6	6	6	3	5	4	4	3	4	3	3	5	5	5	5	5	5	1	1.47	35.6	44
1	12	7	5	6	4	6	6	6	7	7	6	4	5	5	3	3	5	3	2	3	3	3	4	5	3	4	4	3	1	1.45	33.8	41
1	12	7	6	4	7	7	7	6	999	4	6	6	4	6	5	5	5	4	3	4	3	4	3	5	5	4	4	5	1	1.62	45.8	33
1	12	7	6	7	7	7	6	7	5	7	7	7	6	6	3	6	5	4	4	3	4	4	2	3	3	2	3	3	1	1.67	93.6	33
1	13	7	7	6	5	7	5	6	7	4	7	4	7	7	1	3	4	3	4	3	2	3	5	4	4	4	4	4	1	1.66	65	33
1	12	7	6	7	7	7	7	7	7	7	7	7	5	5	3	5	7	4	4	4	4	4	5	5	5	5	5	5	1	1.65	60.2	38
1	12	7	6	6	5	6	7	6	7	7	6	7	5	6	5	5	6	3	4	3	4	3	3	5	2	2	2	2	2	1.68	59.4	33
1	13	7	6	6	4	7	7	6	7	7	7	7	7	7	7	7	7	3	3	4	4	4	4	4	4	2	2	2	1	1.49	45.8	33
2	14	8	5	4	5	5	5	4	6	3	7	6	3	4	2	4	4	3	2	3	3	4	5	4	4	3	4	4	3	1.62	55.9	34
2	13	8	5	4	6	7	6	4	3	5	5	4	6	5	2	3	5	3	2	4	2	4	2	4	4	2	4	4	2	1.56	53.6	38
1	13	8	4	5	4	6	4	5	6	7	7	7	6	3	4	4	5	3	2	3	2	3	2	2	1	1	2	3	1	1.56	62.9	33
1	999	8	6	7	5	7	6	4	7	7	7	7	7	6	4	5	7	3	3	4	4	4	2	2	2	2	2	3	1	1.67	81.8	33
1	14	8	1	6	2	4	3	5	7	6	6	6	4	4	2	4	4	4	3	4	3	4	5	4	5	3	3	4	3	1.62	57.5	56
1	14	8	5	5	5	5	5	5	6	6	7	5	4	5	3	5	4	3	3	4	3	3	5	999	5	5	5	5	3	1.58	42.2	34
1	14	8	6	7	6	7	7	6	7	6	7	6	6	6	7	7	7	4	3	4	3	4	5	5	5	4	5	4	1	1.66	53.4	34
1	14	8	5	7	6	7	6	6	7	6	7	6	5	6	4	6	7	4	4	4	4	4	5	5	5	4	4	5	2	1.62	69.3	35
1	15	8	6	5	5	5	4	6	6	4	6	6	6	5	3	2	4	3	3	3	3	3	4	3	4	2	3	4	3	1.75	69.2	18
1	15	8	7	7	6	7	7	7	6	5	7	6	6	5	3	6	6	4	4	4	4	4	5	5	5	4	5	5	1	1.63	64.5	38
2	14	9	4	6	5	5	6	7	7	4	7	4	7	6	3	5	4	4	3	3	4	4	4	5	3	3	4	4	2	1.55	45.1	43
2	14	9	1	7	6	7	2	4	4	5	7	5	6	3	1	1	1	3	1	3	2	3	3	3	2	2	3	2	1	1.65	66.5	48
2	14	9	5	7	6	7	7	7	7	7	7	6	5	5	3	4	4	1	1	3	1	1	1	3	2	1	3	2	1	1.73	88	27
2	15	9	5	7	6	7	6	7	7	7	7	7	3	4	3	6	3	4	3	4	4	4	5	3	4	3	4	5	1	1.71	65.7	41
1	14	9	5	6	4	6	6	6	6	5	7	5	3	5	2	3	2	3	3	2	3	2	3	4	4	3	4	4	1	1.78	63.3	33
1	16	9	6	6	6	6	6	6	7	5	6	7	999	4	2	7	7	3	3	4	3	3	4	5	4	4	4	4	1	1.71	70.9	26
1	15	9	4	5	5	6	6	5	6	5	6	6	4	4	3	5	5	4	3	4	3	3	5	5	3	4	4	4	1	1.67	80.8	26
1	15	9	5	7	5	7	7	6	7	7	7	7	4	6	1	1	7	4	4	4	3	3	4	3	4	5	5	5	2	1.76	65.7	53
1	14	9	6	7	7	6	7	7	7	5	7	7	6	6	5	4	4	3	3	3	3	2	3	3	3	3	2	2	1	1.73	55.3	26
1	15	9	7	6	6	7	6	7	7	7	6	7	6	6	4	6	5	4	4	4	4	3	5	5	5	5	5	5	1	1.75	54.5	48
1	14	9	4	6	5	6	5	5	7	7	7	6	3	6	2	4	4	4	3	4	3	4	4	4	4	3	4	4	1	1.76	71.1	55
1	15	9	6	6	5	6	6	6	7	6	7	7	4	6	2	6	5	3	2	2	3	3	3	4	3	3	3	3	1	1.72	80.1	53
2	17	9	6	4	4	6	6	4	5	5	6	7	4	5	4	6	5	3	3	3	2	2	3	2	4	3	4	3	3	1.69	67.6	33
2	14	9	6	7	3	5	3	7	7	7	7	4	6	5	1	6	5	3	3	4	3	3	4	4	4	2	4	4	1	1.64	84.1	43
2	14	9	5	3	4	5	4	6	7	6	7	7	7	3	1	4	4	3	3	3	2	3	3	3	5	3	5	5	1	1.65	58.5	60
1	15	9	5	6	4	6	5	6	6	6	6	6	5	5	2	4	3	2	1	3	2	3	3	4	2	3	4	2	1	1.8	86.4	48
1	15	9	2	6	5	6	4	5	7	3	7	5	5	3	1	2	6	3	2	3	2	3	2	2	2	1	2	2	1	1.74	85.4	48
1	14	9	6	6	6	6	7	6	7	6	5	6	6	5	4	3	3	4	4	4	4	4	4	5	5	4	4	5	1	1.72	72.6	42
1	14	9	2	6	4	6	4	4	6	2	6	4	6	6	1	2	2	3	2	3	1	4	1	2	1	1	1	1	1	1.6	55.4	42
1	15	9	2	4	4	4	7	6	7	6	6	6	4	6	1	2	4	2	1	3	2	3	1	1	1	2	2	2	1	1.79	102.4	33
1	15	9	6	7	7	7	7	7	7	6	7	7	7	6	1	4	5	4	4	4	4	4	5	5	5	5	5	5	1	1.75	72	50
1	16	9	6	7	6	7	7	6	7	7	7	7	5	5	3	3	5	4	4	4	3	4	5	5	4	5	5	5	1	1.83	123	43
1	15	9	6	7	7	7	7	7	7	7	7	7	7	6	2	1	3	4	3	2	4	4	2	4	2	2	3	3	1	1.67	96.6	45
1	16	9	7	7	7	7	7	6	6	4	6	7	7	6	2	3	3	1	1	1	1	4	2	4	3	2	3	2	1	1.71	74.2	47
2	11	6	5	7	6	5	7	6	6	1	7	3	2	1	1	5	4	4	3	4	3	3	5	5	5	2	3	4	1	1.6	44.7	33
2	13	6	6	7	3	6	7	7	7	4	7	2	4	4	1	4	1	4	4	4	4	4	5	3	5	4	4	4	3	1.55	44.8	41
2	11	6	6	7	5	3	5	6	7	3	7	5	4	5	1	1	5	3	1	3	3	3	5	5	4	3	3	4	1	1.52	44.6	53
2	11	6	5	6	5	6	5	5	4	1	6	3	4	4	1	1	1	3	2	3	3	4	5	5	5	3	2	5	1	1.58	58.7	38
2	11	6	6	7	7	7	6	3	6	5	6	2	4	6	3	5	2	3	2	3	3	4	3	5	3	3	3	3	1	1.5	44	53
2	11	6	5	6	5	6	7	2	5	2	7	6	6	2	3	7	2	3	1	4	3	2	5	4	4	4	5	5	1	1.58	54.5	41
2	11	6	6	7	3	7	7	7	7	4	7	2	4	6	1	3	1	4	4	4	4	4	4	5	5	5	5	5	2	1.55	47.5	48
2	11	6	6	7	7	7	7	7	7	6	7	7	7	6	4	5	4	4	3	4	3	3	1	5	4	4	4	5	1	1.47	35.1	26
2	11	6	5	4	5	2	2	3	6	3	6	6	3	3	2	6	6	3	2	2	3	3	2	1	2	2	2	1	1	1.62	49.3	66
2	12	6	6	7	4	6	6	6	6	6	6	7	6	3	2	6	2	4	2	2	3	3	2	3	2	2	2	2	1	1.61	56.3	26
1	11	6	7	7	6	7	7	7	7	4	6	1	7	7	4	1	1	4	1	4	3	4	5	5	5	5	5	5	1	1.54	51.4	26
1	11	6	7	7	7	7	7	7	7	3	7	1	7	7	1	3	1	4	3	2	3	4	5	5	5	1	5	5	1	1.49	43.4	33
1	12	6	6	6	5	5	6	6	4	1	4	2	5	4	3	4	1	4	4	4	4	4	5	5	4	5	5	5	1	1.48	40.6	46
1	11	6	6	7	6	7	6	5	6	6	7	4	6	5	3	6	3	3	4	4	3	3	5	4	4	4	5	4	1	1.46	42.8	62
1	11	6	6	6	6	6	7	6	7	7	7	5	6	6	3	4	7	3	3	4	3	4	5	5	5	4	5	5	1	1.72	57.9	42
1	13	6	7	7	6	7	7	6	6	6	7	6	6	6	5	6	3	3	3	4	4	4	4	5	5	4	4	4	1	1.54	52.8	44
1	11	6	2	4	2	3	4	4	1	6	4	6	4	5	1	6	1	4	3	3	4	3	5	4	5	4	3	4	1	1.54	39.6	44
2	12	7	5	6	3	5	4	5	6	4	5	3	4	3	3	3	3	2	1	2	1	2	1	2	1	2	2	2	1	1.62	50.4	41
2	13	7	5	7	4	7	5	4	3	3	5	4	6	4	4	4	3	2	2	2	3	3	4	4	4	3	3	3	2	1.56	78.3	33
2	13	7	6	4	1	3	1	4	7	6	5	5	5	5	1	3	1	3	1	1	1	1	3	4	3	3	2	2	3	1.67	54.9	999
2	12	7	6	5	4	5	4	6	6	4	6	3	5	6	3	3	2	3	1	3	3	3	3	2	2	3	2	2	1	1.78	77.1	33
2	12	7	5	3	5	4	4	2	4	4	5	2	2	5	2	3	2	4	3	4	3	4	4	5	3	4	4	2	3	1.54	42.9	24
2	12	7	5	5	4	5	4	5	6	6	6	6	4	4	5	5	5	3	2	3	2	2	3	3	2	3	4	3	1	1.58	43.8	28
1	12	7	5	6	1	7	7	5	3	2	6	5	6	999	2	2	5	4	3	3	4	4	5	5	5	5	5	5	1	1.62	51.1	33
1	12	7	4	3	3	3	6	3	6	5	6	6	2	4	1	1	4	4	4	4	3	4	4	4	4	4	2	4	1	1.65	85.3	33
1	12	7	5	6	6	7	1	2	1	7	4	1	2	2	3	1	7	4	3	4	4	4	5	4	4	4	1	3	1	1.6	44.2	55
1	13	7	6	6	5	7	7	6	6	5	7	5	5	4	1	1	1	4	2	3	4	4	1	999	5	4	4	5	1	1.51	52.1	48
1	13	7	7	7	6	7	7	6	6	7	6	7	5	7	4	5	7	4	3	4	4	4	5	5	4	5	5	5	1	1.67	59.4	55
1	13	7	4	7	6	6	7	5	7	7	7	4	6	7	7	4	4	4	3	4	4	4	5	5	5	5	5	5	2	1.75	78.9	36
1	13	7	7	7	7	7	6	6	7	6	7	6	6	6	7	5	6	3	3	3	4	4	4	4	4	2	4	4	3	1.62	57.5	76
1	13	7	6	7	6	7	6	7	7	6	7	6	5	5	3	6	5	4	4	4	3	4	5	5	5	5	5	5	1	1.65	56.4	33
2	14	8	6	4	3	4	4	5	7	5	7	6	4	3	3	4	3	4	2	2	3	3	4	4	4	3	3	3	2	1.61	46.2	999
2	13	8	6	7	6	7	7	7	7	7	6	7	5	5	5	5	5	3	2	4	3	3	4	3	2	2	2	2	1	1.66	69.8	45
2	14	8	5	6	4	5	5	4	6	6	6	6	3	3	2	4	3	4	3	3	3	4	4	5	5	4	4	2	1	1.62	51.2	43
2	13	8	5	6	5	6	4	6	6	5	6	4	6	5	6	4	5	4	4	3	3	4	5	5	4	5	5	4	2	1.68	69.3	27
2	14	8	5	6	5	5	4	7	7	6	7	6	6	4	3	6	4	4	4	4	3	4	5	5	5	5	4	5	1	1.7	87.7	29
2	13	8	5	5	3	1	5	6	7	3	4	5	4	3	1	4	4	4	3	3	3	4	4	4	3	4	4	4	1	1.54	47.4	43
2	14	8	5	6	6	6	5	6	7	5	7	6	3	5	3	5	6	3	2	3	3	4	4	4	4	4	2	4	1	1.57	53	53
1	14	8	4	7	6	7	4	6	7	7	7	7	7	7	1	4	4	4	4	1	1	4	3	5	4	4	4	4	1	1.67	52	21
1	13	8	4	6	5	4	5	6	3	4	2	6	5	5	5	5	4	3	2	3	2	3	5	2	4	3	4	4	1	1.66	77.2	69
1	14	8	4	7	3	4	5	5	7	5	5	4	7	2	1	1	2	4	4	4	4	4	5	5	5	5	5	5	1	1.77	52.3	48
1	14	8	6	7	6	7	6	6	6	5	7	6	5	6	5	5	6	4	4	4	4	4	5	5	5	5	5	4	1	1.76	68.8	26
1	14	8	5	7	7	7	5	4	2	3	7	7	7	7	3	4	5	4	4	4	4	4	5	4	5	5	5	5	1	1.71	90.8	26
1	13	8	6	5	4	7	7	7	7	2	7	3	5	5	2	6	1	4	2	3	2	4	4	4	4	2	3	3	1	1.74	66.3	53
1	14	8	6	4	5	5	4	5	3	5	4	5	5	2	3	3	2	3	2	3	3	3	5	4	4	5	5	5	1	1.75	65.9	60
1	16	8	5	6	6	7	3	6	7	2	3	3	5	5	1	3	2	3	2	4	3	4	5	2	2	2	4	2	1	1.82	69.7	58
1	13	8	5	5	3	5	3	6	6	3	7	3	6	3	2	5	2	4	4	4	4	4	5	5	4	5	5	5	1	1.75	60.9	33
1	14	8	4	1	3	4	2	6	1	6	4	2	4	6	5	5	5	2	1	1	1	3	2	2	3	1	3	2	1	1.7	70.1	45
1	13	8	5	6	6	7	7	999	7	7	7	7	7	6	3	5	1	4	3	4	3	3	5	5	5	5	5	5	1	1.56	47.6	42
1	13	8	7	7	7	5	7	6	5	3	5	1	7	3	2	1	1	3	3	4	4	4	5	5	5	4	5	5	1	1.51	34.7	26
1	13	8	1	6	7	5	5	6	4	1	6	1	4	1	1	1	2	2	3	1	1	2	4	3	5	3	4	5	3	1.58	68.9	51
1	15	8	4	4	4	5	3	4	4	5	4	5	5	3	5	3	4	3	2	3	4	3	1	3	3	3	4	3	1	1.75	63	42
1	13	8	7	5	4	7	6	6	3	4	7	5	7	5	1	5	1	4	3	4	4	3	3	5	3	3	5	5	1	1.69	45.5	41
2	15	9	7	7	7	7	7	7	6	6	7	7	7	5	5	6	5	4	4	4	4	4	5	5	5	5	5	5	1	1.8	60.7	32
2	14	9	6	5	6	5	3	5	7	4	6	4	6	5	3	4	3	4	3	3	3	2	4	5	2	4	4	4	1	1.65	51.9	33
2	14	9	5	6	4	6	6	5	7	6	7	6	5	5	2	7	7	3	1	2	3	3	4	4	2	2	2	2	3	1.61	52.9	21
2	15	9	6	5	6	7	6	7	3	4	7	4	4	6	5	5	5	4	2	3	3	4	4	3	3	4	3	4	3	1.65	72.2	42
2	14	9	6	7	7	6	5	7	6	7	6	5	7	6	4	6	6	4	3	3	2	3	5	3	3	2	3	5	1	1.68	50.5	56
1	16	9	6	6	5	7	5	5	5	7	6	5	6	5	3	3	3	3	2	4	3	3	4	3	2	4	3	4	1	1.89	112.1	45
1	16	9	6	5	7	7	6	6	7	6	7	3	6	4	1	3	5	3	3	2	4	4	5	3	4	4	4	3	1	1.74	70.5	45
1	16	9	7	7	5	7	7	7	5	6	6	4	6	6	5	6	3	4	4	4	3	4	5	5	5	5	5	5	2	1.72	56.5	29
1	14	9	4	6	4	6	4	6	6	6	7	7	7	2	1	5	4	3	3	2	4	3	2	4	4	5	4	5	1	1.69	53.6	999
1	14	9	6	6	4	4	5	6	5	5	6	3	6	5	3	5	4	3	4	4	4	3	5	4	5	4	5	4	3	1.66	54.3	26
2	15	10	4	999	2	4	4	4	6	3	2	4	5	4	2	4	4	2	2	2	999	3	1	3	2	1	1	1	1	1.62	70.4	53
2	16	10	4	5	3	4	3	5	5	5	3	5	5	4	3	4	3	2	2	3	3	3	1	4	1	1	1	1	1	1.64	55.4	53
2	16	10	5	4	5	4	6	5	6	6	7	6	6	5	2	5	5	2	3	4	3	4	4	4	2	4	4	4	1	1.63	59.3	66
2	16	10	5	6	4	6	6	6	6	3	6	5	3	3	3	5	6	4	3	4	4	4	2	2	2	2	2	2	2	1.71	999	34
2	15	10	6	7	6	7	7	5	5	7	7	7	7	6	6	5	6	3	2	3	3	3	5	4	5	3	4	4	1	1.76	71.8	49
2	15	10	6	6	6	6	7	7	4	5	7	5	3	3	4	6	5	4	3	3	4	4	4	2	2	1	2	2	1	1.7	70.1	60
2	16	10	6	7	7	7	4	6	7	5	7	7	6	5	5	5	5	4	2	3	3	3	4	5	5	4	3	3	2	1.61	72.2	42
2	16	10	7	5	7	6	7	7	3	7	7	6	7	6	4	6	3	4	3	4	2	3	5	5	5	4	5	5	1	1.7	65.3	48
2	15	10	6	3	6	6	7	5	5	6	7	2	6	7	3	6	3	4	2	1	1	3	3	5	4	5	4	5	1	1.63	69.4	52
2	16	10	7	6	7	7	6	6	5	6	7	7	6	6	7	6	6	3	2	3	4	2	3	5	3	4	4	4	2	1.71	999	37
2	16	10	6	6	6	7	6	6	6	6	7	6	6	6	5	6	6	3	3	3	3	3	5	5	5	5	4	4	1	1.71	58	53
1	16	10	7	7	7	7	6	7	7	5	7	6	7	6	3	7	5	4	3	4	4	4	5	5	5	5	5	5	1	1.67	57.5	66
1	16	10	6	4	7	7	7	7	7	4	7	4	5	6	4	5	7	4	4	4	4	4	4	5	4	4	4	3	3	1.71	75	42
1	16	10	7	6	7	7	6	6	7	7	6	7	5	6	3	3	3	2	1	3	2	3	5	4	4	3	4	5	1	1.8	63.2	56
1	17	10	6	7	7	7	6	7	7	7	7	7	6	6	3	3	5	4	3	3	4	2	4	3	4	4	4	4	1	1.67	75.6	40
1	16	10	7	6	6	6	7	7	4	7	7	7	6	6	4	3	3	4	3	4	2	4	5	4	5	2	2	4	1	1.7	92.3	61
1	16	10	6	6	6	6	6	6	5	5	6	5	6	6	5	5	6	4	3	3	3	3	4	5	5	5	4	4	2	1.71	73	34
1	16	10	6	4	5	7	5	4	5	3	6	3	4	5	3	3	3	3	3	2	3	4	5	2	3	2	3	2	1	1.76	64	50
1	16	10	7	7	7	7	7	7	5	6	7	7	6	6	5	6	6	4	3	4	4	3	5	4	5	4	4	4	3	1.69	72.7	33
1	15	10	6	5	4	6	5	6	7	6	7	7	5	5	2	6	3	4	3	4	3	4	5	5	5	4	4	5	3	1.86	69.7	42
2	11	6	5	2	3	2	1	2	6	1	7	2	6	3	1	5	2	3	2	3	4	4	5	5	5	3	4	4	1	1.7	56.2	49
2	11	6	6	6	6	7	6	7	7	7	7	6	6	6	3	3	5	4	4	3	3	4	5	5	5	2	2	5	3	1.55	61	32
2	11	6	4	6	6	6	6	6	7	3	7	4	7	4	5	5	4	4	3	4	4	3	4	3	4	3	4	4	1	1.54	44.7	27
2	11	6	5	5	6	7	5	3	2	4	4	6	3	5	1	1	1	3	2	3	1	999	5	5	5	5	4	5	3	1.55	37.4	59
2	12	6	3	3	3	5	3	3	6	5	6	6	5	5	3	3	3	3	3	3	2	4	4	4	4	4	3	4	2	1.63	41.9	27
2	11	6	4	6	1	1	4	6	7	4	4	3	4	2	7	6	1	3	4	3	3	3	4	4	5	3	2	4	3	1.54	58.4	44
2	12	6	6	7	7	999	6	4	6	3	6	4	5	4	5	6	3	4	4	4	4	3	5	4	5	4	4	5	1	1.62	56.1	33
2	11	6	6	5	4	6	7	5	6	7	5	5	6	7	3	6	7	4	3	4	3	4	5	4	5	5	5	5	3	1.56	45.3	59
2	11	6	3	6	3	7	7	3	5	6	6	5	5	5	2	5	3	3	2	1	3	3	5	4	4	4	4	5	1	1.49	34.6	48
2	12	6	7	6	5	7	7	7	7	6	7	6	6	7	5	6	7	4	4	4	4	3	5	5	5	4	5	5	3	1.5	45.2	63
1	12	6	7	7	7	7	7	6	6	4	7	7	6	4	3	5	3	4	4	4	4	4	5	5	5	4	5	5	1	1.43	36.1	64
1	12	6	5	6	5	6	6	6	7	2	4	5	5	4	1	3	3	4	3	3	2	3	5	5	5	5	5	5	1	1.53	36.3	70
1	11	6	6	5	7	5	7	5	7	6	7	7	7	3	1	4	6	4	4	4	3	4	5	5	5	3	5	5	1	1.41	30.9	32
1	11	6	5	6	6	7	6	5	7	6	6	6	7	5	2	5	6	3	3	3	3	4	4	4	3	3	3	4	1	1.5	50.7	41
1	13	6	7	7	7	7	2	7	7	4	7	4	7	4	2	2	2	4	4	1	4	1	5	5	1	5	5	5	1	1.62	47.9	29
1	11	6	3	4	2	4	2	4	6	2	2	2	1	2	2	2	2	3	2	3	4	3	4	3	4	3	4	4	1	1.63	68.1	33
1	11	6	6	3	7	5	7	4	7	7	2	999	5	2	1	1	1	4	3	2	2	4	5	5	5	5	4	5	3	1.46	37.8	53
1	12	6	6	7	4	7	7	7	7	5	7	7	7	4	4	5	5	4	3	3	4	3	5	5	4	5	5	5	2	1.55	40.3	30
1	11	6	4	6	6	4	4	5	7	4	7	4	2	4	1	1	1	4	3	4	4	3	5	5	5	4	3	3	1	1.56	44.8	41
1	12	6	7	7	7	7	7	6	7	3	7	5	7	5	3	5	4	4	4	4	3	4	5	5	5	5	5	5	1	1.64	42.8	26
2	12	7	6	6	6	6	6	6	6	6	6	6	6	6	6	6	5	3	4	4	3	3	5	5	5	4	4	4	3	1.61	65	33
2	14	7	6	6	7	6	7	6	7	6	7	6	6	6	3	5	6	3	4	4	4	3	5	5	5	4	4	4	1	1.59	43.7	32
2	13	7	5	3	5	3	5	6	7	6	7	6	5	5	6	4	3	3	2	2	2	3	4	3	4	4	4	4	1	1.66	68.4	32
2	13	7	6	4	4	6	4	4	7	6	6	5	3	5	3	4	3	3	2	2	999	3	5	5	5	3	4	4	1	1.62	53.2	42
2	13	7	3	4	4	6	7	6	7	6	6	7	2	3	1	1	1	4	2	4	2	1	4	4	2	1	5	5	1	1.53	47.6	18
2	12	7	4	4	4	4	4	5	7	5	5	6	4	4	3	3	4	3	2	3	2	3	3	4	3	3	3	4	3	1.63	55.8	33
2	13	7	7	7	7	7	6	7	7	5	7	5	6	6	5	5	4	4	4	4	2	3	5	5	3	5	5	4	2	1.61	66	34
1	13	7	2	5	2	3	6	4	4	5	6	3	3	3	1	2	1	4	3	4	4	4	5	4	5	4	3	4	1	1.72	46.9	56
1	13	7	1	1	1	1	5	4	2	2	7	4	2	2	3	2	2	2	3	2	4	2	3	3	3	1	3	3	3	1.76	101	33
1	12	7	2	4	2	4	6	4	2	2	6	2	5	3	1	1	1	4	3	3	4	4	5	5	5	4	4	4	1	1.64	55.8	41
1	12	7	5	5	7	5	3	3	7	3	7	3	6	7	2	3	3	3	2	4	2	3	5	2	5	2	2	4	3	1.7	73	53
1	13	7	4	3	4	3	6	5	7	4	6	5	6	6	3	3	4	2	2	2	2	3	2	3	2	2	2	2	1	1.6	41.6	53
1	13	7	5	6	6	7	6	5	7	6	7	7	4	5	3	5	5	3	3	4	4	4	4	4	5	4	4	4	3	1.62	67.7	42
1	13	7	5	3	6	4	3	6	6	1	6	1	7	3	4	2	2	4	4	4	4	4	4	5	4	5	5	5	1	1.73	60.5	38
1	12	7	6	6	6	6	6	6	6	4	7	4	6	6	5	4	6	3	3	3	3	4	5	5	4	5	4	4	1	1.58	48.6	33
1	12	7	3	5	3	4	6	5	6	4	5	3	4	4	2	2	1	4	4	4	4	4	4	4	4	4	5	5	1	1.57	45.2	36
2	15	8	4	6	4	6	6	4	6	4	7	4	5	6	3	5	3	4	3	4	4	3	4	3	3	3	4	4	2	1.6	50.5	44
2	13	8	4	6	5	5	7	4	6	4	6	5	5	4	4	4	4	3	3	3	3	3	3	3	2	3	3	4	1	1.61	52.1	41
2	16	8	5	7	5	6	5	4	7	5	6	6	4	4	4	5	3	4	3	3	3	3	5	5	5	4	4	4	2	1.78	50.2	27
2	13	8	6	4	6	7	7	6	7	7	7	7	4	6	7	6	5	4	3	3	3	4	5	5	5	3	2	5	1	1.73	52	56
2	14	8	6	7	7	7	7	4	7	7	7	7	6	4	7	7	7	4	4	4	4	4	5	5	5	5	5	5	3	1.62	50.4	70
1	15	8	6	6	6	5	6	3	7	4	7	6	7	2	1	1	1	3	2	4	4	3	5	5	3	4	5	4	1	1.7	50.9	36
1	14	8	4	5	5	5	3	4	6	7	4	7	6	5	4	6	4	4	3	4	3	4	4	5	4	5	5	5	1	1.67	49	57
1	14	8	5	7	6	6	6	6	7	7	7	6	6	6	4	4	3	4	3	4	3	3	5	5	4	5	5	4	1	1.72	59.8	70
1	13	8	6	6	4	6	4	6	7	4	6	5	4	5	3	4	2	3	3	3	3	3	4	3	4	4	3	4	1	1.55	46.7	33
1	14	8	6	6	6	7	6	6	7	5	6	7	4	999	3	5	5	4	2	4	3	3	5	4	5	4	5	5	1	1.69	83.5	26
1	15	8	6	6	5	7	5	6	7	7	7	7	6	6	5	6	4	4	3	4	3	4	5	4	5	4	5	4	1	1.67	63.1	56
1	13	8	6	7	6	7	7	7	7	7	7	7	6	6	4	6	7	4	3	4	4	4	5	5	5	5	5	5	1	1.65	64.1	26
1	14	8	4	3	4	6	2	3	6	2	6	1	5	5	1	3	1	4	4	3	3	4	4	5	5	5	5	4	1	1.8	59.2	49
1	15	8	3	7	5	5	6	6	7	7	7	7	7	6	4	4	6	4	3	3	3	2	4	3	4	3	5	5	3	1.66	74.5	68
1	14	8	3	6	1	5	4	5	7	2	7	6	3	4	2	3	2	3	3	3	3	2	3	2	2	1	1	1	2	1.6	39.8	69
1	14	8	4	5	5	6	6	6	6	5	7	6	7	6	6	5	4	4	3	3	4	3	4	3	5	4	4	5	2	1.63	65.6	70
2	18	9	6	5	4	5	4	6	7	4	6	5	4	4	5	4	6	3	3	2	3	2	3	3	3	4	3	2	2	1.6	41.6	33
2	15	9	6	7	4	5	4	6	6	7	5	4	5	4	2	4	4	4	4	4	3	3	5	5	5	5	5	5	2	1.6	45.8	29
2	15	9	4	3	2	6	5	4	6	4	7	7	5	3	6	7	6	3	2	3	3	3	1	2	2	1	2	4	1	1.55	54.1	29
2	16	9	3	6	1	6	4	2	7	2	6	1	5	2	1	3	1	2	1	2	1	3	4	5	4	4	2	4	1	1.72	49.3	36
2	15	9	7	6	6	6	7	6	7	7	6	7	6	6	6	6	4	4	4	4	3	4	5	5	5	5	5	5	1	1.69	66.6	41
2	14	9	6	7	7	7	7	7	7	7	7	6	6	6	4	5	4	4	4	4	4	4	5	5	5	5	5	5	1	1.7	61.3	62
2	15	9	3	5	5	5	4	4	6	6	5	6	4	4	4	4	4	3	3	3	3	3	4	3	3	2	3	3	1	1.63	77	29
2	16	9	6	6	5	6	6	6	6	5	6	6	5	6	999	6	5	3	3	3	3	3	5	4	4	3	4	4	3	1.64	52.6	45
2	15	9	6	999	4	4	4	6	4	5	6	6	6	6	3	5	4	3	3	2	3	4	3	3	3	3	3	3	1	1.57	74.2	53
2	14	9	4	6	999	4	7	6	7	7	7	7	5	6	4	5	4	3	1	3	3	3	4	999	2	2	3	2	1	1.71	95.2	42
1	17	9	7	6	4	7	7	6	7	6	7	4	3	4	4	2	1	4	3	3	2	3	5	5	5	5	5	5	2	1.66	77.2	37
1	16	9	6	6	6	5	7	7	7	7	7	6	7	5	3	5	5	3	2	2	3	2	5	4	5	5	5	5	2	1.6	66.3	999
1	18	9	7	7	7	7	7	7	6	7	7	5	7	5	5	6	6	4	4	3	4	4	5	5	5	5	5	5	1	1.81	66.9	43
1	999	9	6	7	5	7	7	7	7	7	7	6	7	7	6	7	7	4	4	3	3	2	5	5	3	5	5	5	3	1.75	61.3	33
1	15	9	4	5	4	6	5	5	7	6	7	6	4	4	3	4	6	3	2	3	3	999	3	3	999	2	2	2	1	1.84	96.3	42
1	14	9	3	6	5	6	6	5	6	5	6	6	5	6	3	3	5	4	4	4	4	4	4	4	4	4	4	4	1	1.73	58.2	60
1	16	9	5	6	6	7	5	5	7	4	6	5	6	4	2	1	6	3	2	2	3	3	4	3	3	2	2	2	1	1.86	79.9	66
1	15	9	7	7	7	7	7	6	7	7	7	7	6	6	5	6	7	4	4	4	4	4	5	5	5	5	5	5	1	1.77	83.2	53
1	15	9	7	6	4	6	7	6	7	7	7	7	4	7	2	6	6	4	4	3	4	4	5	5	5	5	5	5	1	1.73	74.3	41
1	17	9	7	6	6	7	6	6	7	7	7	5	6	6	6	6	6	4	3	2	3	2	2	4	2	1	2	2	2	1.69	80	64
